# Supplementary material
Source: publisher figshare collection journal article supplement (https://gsapubs.figshare.com/articles/dataset/_/12533675)
Supplement: Supplementary file 1 [file 1]

## Sheet: Explanation
Introduction
This spreadsheet shows the raw greyscale intensity data for each profile analysed.
It is organised by crystal.
Each profile was then calibrated by comparing the forsterite content of the olivine, as analysed and calculated from EPMA measurements (see Probe data worksheet), with the grey scale seen in the backscatter images.
The best fit line between these was used to calibrate the greyscale on the images to a forsterite content.
Sample names
e.g. Ep1_15
Ep1 refers to a crystal erupted from episode 1 of the eruption
15 refers to the crystal number in the analysed stub

## Sheet: Ep1_15
Distance (Arbitrary Units)	Distance (um)	Greyscale (arbitrary units)	Distance from updated Crystal Edge (um)	Fo (See probe data workbook)	Calibrated Fo
0	0	202.311					Probe line length	Step
0.0294	1.34355	155.25					126.246	31.5615
0.0588	2.68709	136.985
0.0882	4.03064	105.061
0.1176	5.37418	94.2462	0	83.862	83.855
0.1471	6.7223	90.0923	1.34812		84.078
0.1765	8.06584	88.2346	2.69166		84.1778
0.2059	9.40939	83.2731	4.03521		84.4442
0.2353	10.7529	77.8077	5.37875		84.7377
0.2647	12.0965	75.6692	6.7223		84.8526
0.2941	13.44	73.8731	8.06584		84.949
0.3235	14.7836	71.85	9.40939		85.0577
0.3529	16.1271	68.9462	10.7529		85.2136
0.3824	17.4752	67.5038	12.101		85.291
0.4118	18.8188	64.3808	13.4446		85.4588
0.4412	20.1623	63.8269	14.7881		85.4885
0.4706	21.5059	63.6038	16.1317		85.5005
0.5	22.8494	61.55	17.4752		85.6108
0.5294	24.193	59.5	18.8188		85.7208
0.5588	25.5365	58.3654	20.1623		85.7818
0.5882	26.88	57.7115	21.5059		85.8169
0.6176	28.2236	56.7423	22.8494		85.8689
0.6471	29.5717	56.4846	24.1975		85.8828
0.6765	30.9153	56.5038	25.5411		85.8817
0.7059	32.2588	54.5231	26.8846		85.9881
0.7353	33.6023	54.2192	28.2282		86.0044
0.7647	34.9459	54.5231	29.5717		85.9881
0.7941	36.2894	54.7731	30.9153		85.9747
0.8235	37.633	53.3038	32.2588	86.0254	86.0536
0.8529	38.9765	53.5846	33.6023		86.0385
0.8824	40.3246	52.4731	34.9505		86.0982
0.9118	41.6682	52.9038	36.294		86.0751
0.9412	43.0117	52.6077	37.6376		86.091
0.9706	44.3553	52.4231	38.9811		86.1009
1	45.6988	51.5577	40.3246		86.1474
1.0294	47.0424	50.7192	41.6682		86.1924
1.0588	48.3859	50.7731	43.0117		86.1895
1.0882	49.7295	51.1692	44.3553		86.1682
1.1176	51.073	52.8962	45.6988		86.0755
1.1471	52.4211	53.2	47.0469		86.0592
1.1765	53.7647	51.8731	48.3905		86.1304
1.2059	55.1082	52.4269	49.734		86.1007
1.2353	56.4518	49.9154	51.0776		86.2355
1.2647	57.7953	51.0885	52.4211		86.1725
1.2941	59.1389	52.2615	53.7647		86.1096
1.3235	60.4824	50.1231	55.1082		86.2244
1.3529	61.8259	50.7538	56.4518		86.1905
1.3824	63.1741	49.0231	57.7999		86.2835
1.4118	64.5176	49.2462	59.1434		86.2715
1.4412	65.8611	49.1308	60.487		86.2777
1.4706	67.2047	49.8231	61.8305		86.2405
1.5	68.5482	49.75	63.1741	86.386	86.2444
1.5294	69.8918	49.5808	64.5176		86.2535
1.5588	71.2353	51.7731	65.8611		86.1358
1.5882	72.5789	51.25	67.2047		86.1639
1.6176	73.9224	49.3308	68.5482		86.2669
1.6471	75.2705	48.5192	69.8964		86.3105
1.6765	76.6141	48.1654	71.2399		86.3295
1.7059	77.9576	49.8615	72.5834		86.2384
1.7353	79.3012	50.0577	73.927		86.2279
1.7647	80.6447	49.3077	75.2705		86.2682
1.7941	81.9883	49.5962	76.6141		86.2527
1.8235	83.3318	48.9346	77.9576		86.2882
1.8529	84.6754	48.1769	79.3012		86.3289
1.8824	86.0235	49.3077	80.6493		86.2682
1.9118	87.367	48.2846	81.9928		86.3231
1.9412	88.7106	48.3692	83.3364		86.3186
1.9706	90.0541	50.2692	84.6799		86.2165
2	91.3977	51.0192	86.0235		86.1763
2.0294	92.7412	51.9962	87.367		86.1238
2.0588	94.0847	51.0769	88.7106		86.1732
2.0882	95.4283	50.8808	90.0541		86.1837
2.1176	96.7718	49.9308	91.3977		86.2347
2.1471	98.12	49.7269	92.7458		86.2457
2.1765	99.4635	51.0962	94.0893	86.0553	86.1721
2.2059	100.807	50.2077	95.4329		86.2198
2.2353	102.151	50.1423	96.7764		86.2234
2.2647	103.494	51.1077	98.12		86.1715
2.2941	104.838	51.1115	99.4635		86.1713
2.3235	106.181	50.0269	100.807		86.2296
2.3529	107.525	50.8538	102.151		86.1852
2.3824	108.873	51.7538	103.499		86.1368
2.4118	110.216	50.1615	104.842		86.2223
2.4412	111.56	50.2038	106.186		86.2201
2.4706	112.904	50.7615	107.529		86.1901
2.5	114.247	52.5308	108.873		86.0951
2.5294	115.591	51.1846	110.216		86.1674
2.5588	116.934	49.75	111.56		86.2444
2.5882	118.278	49.9	112.904		86.2364
2.6176	119.621	50.7423	114.247		86.1911
2.6471	120.969	50.1538	115.595		86.2227
2.6765	122.313	49.8423	116.939		86.2395
2.7059	123.656	50.7231	118.282		86.1922
2.7353	125	50.6538	119.626		86.1959

## Sheet: Ep3_2
Distance from Crystal Edge (um)	Distance (um)	Distance (Arbitrary Units)	Greyscale (arbitrary units)	Distance from updated Crystal Edge (um)	Fo (See probe data workbook)	Calibrated Fo
0	0	0	231.196					Probe line length	Step
0.131873	0.131873	0.0294	230.468					47.424	11.856
0.263746	0.263746	0.0588	229.585
0.395619	0.395619	0.0882	228.18
0.527492	0.527492	0.1176	224.714
0.659813	0.659813	0.1471	220.879
0.791686	0.791686	0.1765	215.826
0.923559	0.923559	0.2059	210.501
1.05543	1.05543	0.2353	206.193
1.1873	1.1873	0.2647	201.7
1.31918	1.31918	0.2941	197.997
1.45105	1.45105	0.3235	196.218
1.58292	1.58292	0.3529	193.414	0	81.936	81.7653
1.71524	1.71524	0.3824	191.952	0.132321		81.8388
1.84712	1.84712	0.4118	190.031	0.264194		81.9354
1.97899	1.97899	0.4412	188.625	0.396067		82.0062
2.11086	2.11086	0.4706	188.545	0.52794		82.0102
2.24274	2.24274	0.5	188.236	0.659813		82.0257
2.37461	2.37461	0.5294	186.768	0.791686		82.0996
2.50648	2.50648	0.5588	186.338	0.923559		82.1212
2.63835	2.63835	0.5882	185.318	1.05543		82.1725
2.77023	2.77023	0.6176	184.415	1.1873		82.2179
2.90255	2.90255	0.6471	183.603	1.31963		82.2588
3.03442	3.03442	0.6765	183.706	1.4515		82.2536
3.16629	3.16629	0.7059	183.934	1.58337		82.2421
3.29817	3.29817	0.7353	183.371	1.71524		82.2704
3.43004	3.43004	0.7647	181.524	1.84712		82.3633
3.56191	3.56191	0.7941	181.833	1.97899		82.3478
3.69379	3.69379	0.8235	179.973	2.11086		82.4414
3.82566	3.82566	0.8529	179.334	2.24274		82.4735
3.95798	3.95798	0.8824	179.478	2.37506		82.4663
4.08985	4.08985	0.9118	178.505	2.50693		82.5152
4.22173	4.22173	0.9412	177.522	2.6388		82.5646
4.3536	4.3536	0.9706	176.237	2.77068		82.6293
4.48547	4.48547	1	176.05	2.90255		82.6387
4.61734	4.61734	1.0294	175.531	3.03442		82.6648
4.74922	4.74922	1.0588	174.122	3.16629		82.7356
4.88109	4.88109	1.0882	173.028	3.29817		82.7907
5.01296	5.01296	1.1176	172.588	3.43004		82.8128
5.14528	5.14528	1.1471	171.344	3.56236		82.8754
5.27716	5.27716	1.1765	170.74	3.69423		82.9058
5.40903	5.40903	1.2059	170.018	3.82611		82.9421
5.5409	5.5409	1.2353	169.022	3.95798		82.9922
5.67278	5.67278	1.2647	168.969	4.08985		82.9949
5.80465	5.80465	1.2941	167.84	4.22173		83.0516
5.93652	5.93652	1.3235	167.505	4.3536		83.0685
6.0684	6.0684	1.3529	167.665	4.48547		83.0605
6.20072	6.20072	1.3824	166.671	4.61779		83.1104
6.33259	6.33259	1.4118	165.17	4.74967		83.1859
6.46446	6.46446	1.4412	165.704	4.88154		83.1591
6.59634	6.59634	1.4706	163.955	5.01341		83.2471
6.72821	6.72821	1.5	163.112	5.14528		83.2895
6.86008	6.86008	1.5294	163.195	5.27716		83.2853
6.99195	6.99195	1.5588	163.052	5.40903		83.2925
7.12383	7.12383	1.5882	162.671	5.5409		83.3116
7.2557	7.2557	1.6176	162.108	5.67278		83.34
7.38802	7.38802	1.6471	161.241	5.8051		83.3836
7.51989	7.51989	1.6765	160.322	5.93697		83.4298
7.65177	7.65177	1.7059	160.233	6.06884		83.4343
7.78364	7.78364	1.7353	157.459	6.20072		83.5738
7.91551	7.91551	1.7647	158.792	6.33259		83.5067
8.04739	8.04739	1.7941	157.662	6.46446		83.5636
8.17926	8.17926	1.8235	156.389	6.59634		83.6276
8.31113	8.31113	1.8529	155.927	6.72821		83.6509
8.44345	8.44345	1.8824	155.268	6.86053		83.684
8.57533	8.57533	1.9118	155.171	6.9924		83.6889
8.7072	8.7072	1.9412	153.93	7.12428		83.7513
8.83907	8.83907	1.9706	153.758	7.25615		83.76
8.97094	8.97094	2	152.593	7.38802		83.8186
9.10282	9.10282	2.0294	152.339	7.51989		83.8314
9.23469	9.23469	2.0588	151.562	7.65177		83.8704
9.36656	9.36656	2.0882	151.653	7.78364		83.8658
9.49844	9.49844	2.1176	150.196	7.91551		83.9391
9.63076	9.63076	2.1471	150.322	8.04783		83.9328
9.76263	9.76263	2.1765	149.356	8.17971		83.9814
9.8945	9.8945	2.2059	148.197	8.31158		84.0397
10.0264	10.0264	2.2353	149.063	8.44345		83.9961
10.1582	10.1582	2.2647	147.46	8.57533		84.0768
10.2901	10.2901	2.2941	146.478	8.7072		84.1262
10.422	10.422	2.3235	147.218	8.83907		84.0889
10.5539	10.5539	2.3529	145.601	8.97094		84.1703
10.6862	10.6862	2.3824	144.156	9.10327		84.243
10.8181	10.8181	2.4118	143.912	9.23514		84.2552
10.9499	10.9499	2.4412	143.66	9.36701		84.2679
11.0818	11.0818	2.4706	142.383	9.49888		84.3322
11.2137	11.2137	2.5	142.784	9.63076		84.312
11.3456	11.3456	2.5294	141.767	9.76263		84.3631
11.4774	11.4774	2.5588	140.544	9.8945		84.4246
11.6093	11.6093	2.5882	140.852	10.0264		84.4092
11.7412	11.7412	2.6176	139.563	10.1582		84.474
11.8735	11.8735	2.6471	139.809	10.2906		84.4616
12.0054	12.0054	2.6765	139.085	10.4224		84.498
12.1372	12.1372	2.7059	137.734	10.5543		84.566
12.2691	12.2691	2.7353	137.21	10.6862		84.5923
12.401	12.401	2.7647	137.769	10.8181		84.5642
12.5329	12.5329	2.7941	137.487	10.9499		84.5784
12.6647	12.6647	2.8235	135.452	11.0818		84.6807
12.7966	12.7966	2.8529	135.481	11.2137		84.6793
12.9289	12.9289	2.8824	133.242	11.346		84.7919
13.0608	13.0608	2.9118	134.085	11.4779		84.7495
13.1927	13.1927	2.9412	134.086	11.6097		84.7495
13.3245	13.3245	2.9706	132.751	11.7416		84.8166
13.4564	13.4564	3	133.023	11.8735	84.3691	84.8029
13.5883	13.5883	3.0294	132.396	12.0054		84.8345
13.7202	13.7202	3.0588	131.012	12.1372		84.9041
13.852	13.852	3.0882	130.708	12.2691		84.9194
13.9839	13.9839	3.1176	130.197	12.401		84.9451
14.1162	14.1162	3.1471	130.04	12.5333		84.953
14.2481	14.2481	3.1765	128.459	12.6652		85.0325
14.38	14.38	3.2059	128.165	12.7971		85.0473
14.5118	14.5118	3.2353	128.734	12.9289		85.0187
14.6437	14.6437	3.2647	127.483	13.0608		85.0816
14.7756	14.7756	3.2941	126.987	13.1927		85.1065
14.9075	14.9075	3.3235	126.304	13.3245		85.1409
15.0393	15.0393	3.3529	126.6	13.4564		85.126
15.1717	15.1717	3.3824	125.425	13.5887		85.1851
15.3035	15.3035	3.4118	125.222	13.7206		85.1954
15.4354	15.4354	3.4412	123.8	13.8525		85.2668
15.5673	15.5673	3.4706	123.919	13.9844		85.2609
15.6992	15.6992	3.5	123.189	14.1162		85.2976
15.831	15.831	3.5294	123.5	14.2481		85.2819
15.9629	15.9629	3.5588	123.055	14.38		85.3043
16.0948	16.0948	3.5882	121.477	14.5118		85.3837
16.2266	16.2266	3.6176	122.321	14.6437		85.3413
16.359	16.359	3.6471	120.504	14.776		85.4327
16.4908	16.4908	3.6765	119.869	14.9079		85.4646
16.6227	16.6227	3.7059	119.147	15.0398		85.5009
16.7546	16.7546	3.7353	118.251	15.1717		85.546
16.8865	16.8865	3.7647	119.555	15.3035		85.4804
17.0183	17.0183	3.7941	119.102	15.4354		85.5032
17.1502	17.1502	3.8235	117.888	15.5673		85.5642
17.2821	17.2821	3.8529	118.892	15.6992		85.5137
17.4144	17.4144	3.8824	118.619	15.8315		85.5275
17.5463	17.5463	3.9118	117.689	15.9633		85.5742
17.6781	17.6781	3.9412	116.367	16.0952		85.6407
17.81	17.81	3.9706	116.385	16.2271		85.6398
17.9419	17.9419	4	115.348	16.359		85.692
18.0738	18.0738	4.0294	114.894	16.4908		85.7148
18.2056	18.2056	4.0588	114.375	16.6227		85.7409
18.3375	18.3375	4.0882	113.847	16.7546		85.7675
18.4694	18.4694	4.1176	112.744	16.8865		85.823
18.6017	18.6017	4.1471	112.345	17.0188		85.843
18.7336	18.7336	4.1765	112.191	17.1507		85.8508
18.8654	18.8654	4.2059	111.999	17.2825		85.8605
18.9973	18.9973	4.2353	112.298	17.4144		85.8454
19.1292	19.1292	4.2647	111.927	17.5463		85.8641
19.2611	19.2611	4.2941	110.973	17.6781		85.9121
19.3929	19.3929	4.3235	110.818	17.81		85.9198
19.5248	19.5248	4.3529	110.602	17.9419		85.9307
19.6571	19.6571	4.3824	110.839	18.0742		85.9188
19.789	19.789	4.4118	109.892	18.2061		85.9664
19.9209	19.9209	4.4412	110.598	18.338		85.9309
20.0528	20.0528	4.4706	109.336	18.4698		85.9944
20.1846	20.1846	4.5	109.126	18.6017		86.0049
20.3165	20.3165	4.5294	109.229	18.7336		85.9998
20.4484	20.4484	4.5588	108.582	18.8654		86.0323
20.5802	20.5802	4.5882	107.5	18.9973		86.0867
20.7121	20.7121	4.6176	107.595	19.1292		86.082
20.8444	20.8444	4.6471	106.778	19.2615		86.123
20.9763	20.9763	4.6765	107.062	19.3934		86.1088
21.1082	21.1082	4.7059	106.303	19.5253		86.147
21.2401	21.2401	4.7353	105.391	19.6571		86.1929
21.3719	21.3719	4.7647	105.661	19.789		86.1792
21.5038	21.5038	4.7941	105.3	19.9209		86.1974
21.6357	21.6357	4.8235	105.891	20.0528		86.1677
21.7675	21.7675	4.8529	105.924	20.1846		86.166
21.8999	21.8999	4.8824	105.137	20.3169		86.2056
22.0317	22.0317	4.9118	103.781	20.4488		86.2738
22.1636	22.1636	4.9412	103.66	20.5807		86.2799
22.2955	22.2955	4.9706	104.081	20.7126		86.2587
22.4274	22.4274	5	103.535	20.8444		86.2862
22.5592	22.5592	5.0294	102.857	20.9763		86.3203
22.6911	22.6911	5.0588	102.95	21.1082		86.3156
22.823	22.823	5.0882	103.262	21.2401		86.2999
22.9549	22.9549	5.1176	101.923	21.3719		86.3673
23.0872	23.0872	5.1471	102.848	21.5042		86.3208
23.219	23.219	5.1765	103.567	21.6361		86.2846
23.3509	23.3509	5.2059	102.155	21.768		86.3556
23.4828	23.4828	5.2353	101.589	21.8999		86.3841
23.6147	23.6147	5.2647	101.361	22.0317		86.3956
23.7465	23.7465	5.2941	101.119	22.1636		86.4077
23.8784	23.8784	5.3235	100.073	22.2955		86.4603
24.0103	24.0103	5.3529	100.615	22.4274		86.4331
24.1426	24.1426	5.3824	99.3582	22.5597		86.4963
24.2745	24.2745	5.4118	99.4704	22.6916		86.4906
24.4064	24.4064	5.4412	99.9265	22.8234		86.4677
24.5382	24.5382	5.4706	99.4871	22.9553		86.4898
24.6701	24.6701	5.5	98.2126	23.0872		86.5539
24.802	24.802	5.5294	99.6147	23.219		86.4834
24.9338	24.9338	5.5588	98.2796	23.3509		86.5505
25.0657	25.0657	5.5882	99.2191	23.4828		86.5033
25.1976	25.1976	5.6176	97.8441	23.6147		86.5724
25.3299	25.3299	5.6471	99.0361	23.747	86.6053	86.5125
25.4618	25.4618	5.6765	98.6186	23.8789		86.5335
25.5937	25.5937	5.7059	97.433	24.0107		86.5931
25.7255	25.7255	5.7353	96.7603	24.1426		86.627
25.8574	25.8574	5.7647	97.4343	24.2745		86.5931
25.9893	25.9893	5.7941	96.9807	24.4064		86.6159
26.1211	26.1211	5.8235	96.4884	24.5382		86.6406
26.253	26.253	5.8529	96.607	24.6701		86.6347
26.3853	26.3853	5.8824	96.5477	24.8024		86.6377
26.5172	26.5172	5.9118	96.4278	24.9343		86.6437
26.6491	26.6491	5.9412	96.9021	25.0662		86.6198
26.781	26.781	5.9706	95.8325	25.198		86.6736
26.9128	26.9128	6	94.8608	25.3299		86.7225
27.0447	27.0447	6.0294	95.9858	25.4618		86.6659
27.1766	27.1766	6.0588	94.6997	25.5937		86.7306
27.3085	27.3085	6.0882	94.3492	25.7255		86.7482
27.4403	27.4403	6.1176	94.7564	25.8574		86.7278
27.5726	27.5726	6.1471	95.0052	25.9897		86.7152
27.7045	27.7045	6.1765	94.2242	26.1216		86.7545
27.8364	27.8364	6.2059	94.0296	26.2535		86.7643
27.9683	27.9683	6.2353	94.5322	26.3853		86.739
28.1001	28.1001	6.2647	94.6082	26.5172		86.7352
28.232	28.232	6.2941	93.4485	26.6491		86.7935
28.3639	28.3639	6.3235	92.759	26.781		86.8282
28.4958	28.4958	6.3529	93.3338	26.9128		86.7993
28.6281	28.6281	6.3824	93.0387	27.0452		86.8142
28.7599	28.7599	6.4118	93.2152	27.177		86.8053
28.8918	28.8918	6.4412	94.6082	27.3089		86.7352
29.0237	29.0237	6.4706	93.2242	27.4408		86.8048
29.1556	29.1556	6.5	93.6031	27.5726		86.7858
29.2874	29.2874	6.5294	93.5567	27.7045		86.7881
29.4193	29.4193	6.5588	92.8557	27.8364		86.8234
29.5512	29.5512	6.5882	92.9201	27.9683		86.8201
29.6831	29.6831	6.6176	93.8879	28.1001		86.7714
29.8154	29.8154	6.6471	93.4704	28.2325		86.7924
29.9473	29.9473	6.6765	93.3157	28.3643		86.8002
30.0791	30.0791	6.7059	93.6482	28.4962		86.7835
30.211	30.211	6.7353	92.6521	28.6281		86.8336
30.3429	30.3429	6.7647	92.5412	28.7599		86.8392
30.4747	30.4747	6.7941	93.7423	28.8918		86.7788
30.6066	30.6066	6.8235	91.8363	29.0237		86.8746
30.7385	30.7385	6.8529	91.076	29.1556		86.9129
30.8708	30.8708	6.8824	89.9639	29.2879		86.9688
31.0027	31.0027	6.9118	88.9278	29.4198		87.0209
31.1346	31.1346	6.9412	89.2242	29.5516		87.006
31.2664	31.2664	6.9706	87.2925	29.6835		87.1032
31.3983	31.3983	7	87.451	29.8154		87.0952
31.5302	31.5302	7.0294	88.2139	29.9473		87.0568
31.662	31.662	7.0588	90.201	30.0791		86.9569
31.7939	31.7939	7.0882	90.8763	30.211		86.9229
31.9258	31.9258	7.1176	90.8531	30.3429		86.9241
32.0581	32.0581	7.1471	89.5876	30.4752		86.9877
32.19	32.19	7.1765	90.4665	30.6071		86.9435
32.3219	32.3219	7.2059	90.0554	30.7389		86.9642
32.4537	32.4537	7.2353	90.9253	30.8708		86.9205
32.5856	32.5856	7.2647	92.2616	31.0027		86.8532
32.7175	32.7175	7.2941	91.7577	31.1346		86.8786
32.8494	32.8494	7.3235	90.0928	31.2664		86.9623
32.9812	32.9812	7.3529	90.4974	31.3983		86.942
33.1135	33.1135	7.3824	90.7436	31.5306		86.9296
33.2454	33.2454	7.4118	90.2229	31.6625		86.9558
33.3773	33.3773	7.4412	89.7294	31.7944		86.9806
33.5092	33.5092	7.4706	89.8015	31.9262		86.977
33.641	33.641	7.5	90.6057	32.0581		86.9365
33.7729	33.7729	7.5294	89.5284	32.19		86.9907
33.9048	33.9048	7.5588	90.9381	32.3219		86.9198
34.0367	34.0367	7.5882	90.7526	32.4537		86.9291
34.1685	34.1685	7.6176	90.5541	32.5856		86.9391
34.3009	34.3009	7.6471	90.6534	32.7179		86.9341
34.4327	34.4327	7.6765	89.5425	32.8498		86.99
34.5646	34.5646	7.7059	89.8582	32.9817		86.9741
34.6965	34.6965	7.7353	89.2809	33.1135		87.0032
34.8283	34.8283	7.7647	89.4884	33.2454		86.9927
34.9602	34.9602	7.7941	88.9175	33.3773		87.0214
35.0921	35.0921	7.8235	88.5399	33.5092		87.0404
35.224	35.224	7.8529	89.3106	33.641		87.0017
35.3563	35.3563	7.8824	88.9755	33.7734		87.0185
35.4882	35.4882	7.9118	88.9046	33.9052		87.0221
35.62	35.62	7.9412	89.9265	34.0371		86.9707
35.7519	35.7519	7.9706	89.1327	34.169		87.0106
35.8838	35.8838	8	88.6224	34.3009		87.0363
36.0156	36.0156	8.0294	88.768	34.4327		87.029
36.1475	36.1475	8.0588	89.0296	34.5646		87.0158
36.2794	36.2794	8.0882	88.634	34.6965		87.0357
36.4113	36.4113	8.1176	89.1856	34.8283		87.008
36.5436	36.5436	8.1471	88.9291	34.9607		87.0209
36.6755	36.6755	8.1765	88.2023	35.0925		87.0574
36.8073	36.8073	8.2059	89.0206	35.2244		87.0163
36.9392	36.9392	8.2353	89.3157	35.3563		87.0014
37.0711	37.0711	8.2647	88.7152	35.4882		87.0316
37.203	37.203	8.2941	89.0722	35.62	87.1312	87.0137
37.3348	37.3348	8.3235	88.5863	35.7519		87.0381
37.4667	37.4667	8.3529	88.0399	35.8838		87.0656
37.599	37.599	8.3824	88.8956	36.0161		87.0226
37.7309	37.7309	8.4118	88.8389	36.148		87.0254
37.8628	37.8628	8.4412	88.2668	36.2798		87.0542
37.9946	37.9946	8.4706	88.4343	36.4117		87.0458
38.1265	38.1265	8.5	88.9742	36.5436		87.0186
38.2584	38.2584	8.5294	88.1869	36.6755		87.0582
38.3903	38.3903	8.5588	88.4008	36.8073		87.0474
38.5221	38.5221	8.5882	88.4858	36.9392		87.0432
38.654	38.654	8.6176	88.8299	37.0711		87.0259
38.7863	38.7863	8.6471	89.1366	37.2034		87.0104
38.9182	38.9182	8.6765	88.3492	37.3353		87.05
39.0501	39.0501	8.7059	87.5399	37.4671		87.0907
39.1819	39.1819	8.7353	88.6972	37.599		87.0325
39.3138	39.3138	8.7647	88.0026	37.7309		87.0675
39.4457	39.4457	8.7941	88.384	37.8628		87.0483
39.5776	39.5776	8.8235	88.2706	37.9946		87.054
39.7094	39.7094	8.8529	87.7732	38.1265		87.079
39.8418	39.8418	8.8824	88.482	38.2588		87.0434
39.9736	39.9736	8.9118	89.0928	38.3907		87.0126
40.1055	40.1055	8.9412	88.6263	38.5226		87.0361
40.2374	40.2374	8.9706	87.6405	38.6545		87.0857
40.3692	40.3692	9	87.0013	38.7863		87.1178
40.5011	40.5011	9.0294	87.7977	38.9182		87.0778
40.633	40.633	9.0588	87.768	39.0501		87.0793
40.7649	40.7649	9.0882	88.4317	39.1819		87.0459
40.8967	40.8967	9.1176	87.7178	39.3138		87.0818
41.0291	41.0291	9.1471	87.9214	39.4461		87.0716
41.1609	41.1609	9.1765	89.0696	39.578		87.0138
41.2928	41.2928	9.2059	88.1534	39.7099		87.0599
41.4247	41.4247	9.2353	87.1611	39.8418		87.1098
41.5566	41.5566	9.2647	88.4214	39.9736		87.0464
41.6884	41.6884	9.2941	86.4046	40.1055		87.1478
41.8203	41.8203	9.3235	87.0142	40.2374		87.1172
41.9522	41.9522	9.3529	87.3724	40.3692		87.0992
42.0845	42.0845	9.3824	87.6959	40.5016		87.0829
42.2164	42.2164	9.4118	87.8466	40.6334		87.0753
42.3482	42.3482	9.4412	87.5271	40.7653		87.0914
42.4801	42.4801	9.4706	88.7036	40.8972		87.0322
42.612	42.612	9.5	88.549	41.0291		87.04
42.7439	42.7439	9.5294	88.3015	41.1609		87.0524
42.8757	42.8757	9.5588	87.5387	41.2928		87.0908
43.0076	43.0076	9.5882	87.1082	41.4247		87.1125
43.1395	43.1395	9.6176	87.9562	41.5566		87.0698
43.2718	43.2718	9.6471	87.7603	41.6889		87.0797
43.4037	43.4037	9.6765	88.0245	41.8207		87.0664
43.5355	43.5355	9.7059	87.7706	41.9526		87.0791
43.6674	43.6674	9.7353	87.5168	42.0845		87.0919
43.7993	43.7993	9.7647	88.3686	42.2164		87.0491
43.9312	43.9312	9.7941	89.0915	42.3482		87.0127
44.063	44.063	9.8235	87.0735	42.4801		87.1142
44.1949	44.1949	9.8529	87.6791	42.612		87.0837
44.3272	44.3272	9.8824	86.9369	42.7443		87.1211
44.4591	44.4591	9.9118	86.8969	42.8762		87.1231
44.591	44.591	9.9412	88.0348	43.0081		87.0658
44.7228	44.7228	9.9706	87.4794	43.1399		87.0938
44.8547	44.8547	10	87.0799	43.2718		87.1139
44.9866	44.9866	10.0294	87.1894	43.4037		87.1084
45.1185	45.1185	10.0588	87.7268	43.5355		87.0813
45.2503	45.2503	10.0882	87.6211	43.6674		87.0867
45.3822	45.3822	10.1176	88.4201	43.7993		87.0465
45.5145	45.5145	10.1471	87.6907	43.9316		87.0832
45.6464	45.6464	10.1765	87.1894	44.0635		87.1084
45.7783	45.7783	10.2059	87.7861	44.1954		87.0784
45.9102	45.9102	10.2353	87.1095	44.3272		87.1124
46.042	46.042	10.2647	87.3119	44.4591		87.1022
46.1739	46.1739	10.2941	87.3582	44.591		87.0999
46.3058	46.3058	10.3235	87.6778	44.7228		87.0838
46.4376	46.4376	10.3529	87.4768	44.8547		87.0939
46.57	46.57	10.3824	87.7139	44.987		87.082
46.7018	46.7018	10.4118	86.8557	45.1189		87.1252
46.8337	46.8337	10.4412	87.549	45.2508		87.0903
46.9656	46.9656	10.4706	87.7887	45.3827		87.0782
47.0975	47.0975	10.5	88.174	45.5145		87.0588
47.2293	47.2293	10.5294	87.616	45.6464		87.0869
47.3612	47.3612	10.5588	87.4149	45.7783		87.097
47.4931	47.4931	10.5882	87.5722	45.9102		87.0891
47.6249	47.6249	10.6176	87.8028	46.042		87.0775
47.7573	47.7573	10.6471	87.8918	46.1743		87.073
47.8891	47.8891	10.6765	88.4755	46.3062		87.0437
48.021	48.021	10.7059	87.7874	46.4381		87.0783
48.1529	48.1529	10.7353	88.1598	46.57		87.0596
48.2848	48.2848	10.7647	87.317	46.7018		87.102
48.4166	48.4166	10.7941	87.6456	46.8337		87.0854
48.5485	48.5485	10.8235	87.2358	46.9656		87.106
48.6804	48.6804	10.8529	87.067	47.0975		87.1145
48.8127	48.8127	10.8824	86.9317	47.2298		87.1213
48.9446	48.9446	10.9118	87.9987	47.3617		87.0677
49.0764	49.0764	10.9412	87.692	47.4935	87.1266	87.0831
49.2083	49.2083	10.9706	87.2165	47.6254		87.107
49.3402	49.3402	11	88.2126	47.7573		87.0569
49.4721	49.4721	11.0294	87.7719	47.8891		87.0791
49.6039	49.6039	11.0588	87.3634	48.021		87.0996
49.7358	49.7358	11.0882	87.4034	48.1529		87.0976
49.8677	49.8677	11.1176	88.2216	48.2848		87.0565
50	50	11.1471	88.4858	48.4171		87.0432

## Sheet: Ep3_4
Distance from Crystal Edge (um)	Distance (um)	Distance (Arbitrary Units)	Greyscale (arbitrary units)	Distance from updated Crystal Edge (um)	Fo (See probe data workbook)	Calibrated Fo
0	0	0	246.94					Probe line length	Step
0.961161	0.961161	0.0294	243.583					101.272	25.318
1.92232	1.92232	0.0588	237.437
2.88348	2.88348	0.0882	229.907
3.84464	3.84464	0.1176	219.616
4.80908	4.80908	0.1471	206.907
5.77024	5.77024	0.1765	193.371	0	82.3848	82.4617
6.7314	6.7314	0.2059	189.139	0.961161		82.6793
7.69256	7.69256	0.2353	186.556	1.92232		82.812
8.65372	8.65372	0.2647	183.768	2.88348		82.9553
9.61488	9.61488	0.2941	182.258	3.84464		83.0329
10.576	10.576	0.3235	179.483	4.80581		83.1756
11.5372	11.5372	0.3529	178.808	5.76697		83.2103
12.5016	12.5016	0.3824	178.318	6.7314		83.2355
13.4628	13.4628	0.4118	178.199	7.69256		83.2416
14.424	14.424	0.4412	174.927	8.65372		83.4097
15.3851	15.3851	0.4706	171.43	9.61488		83.5895
16.3463	16.3463	0.5	171.596	10.576		83.581
17.3074	17.3074	0.5294	171.636	11.5372		83.5789
18.2686	18.2686	0.5588	169.351	12.4984		83.6964
19.2298	19.2298	0.5882	168.623	13.4595		83.7338
20.1909	20.1909	0.6176	165.093	14.4207		83.9152
21.1554	21.1554	0.6471	164.609	15.3851		83.9401
22.1165	22.1165	0.6765	163.099	16.3463		84.0177
23.0777	23.0777	0.7059	161.47	17.3074		84.1014
24.0388	24.0388	0.7353	160.795	18.2686		84.1362
25	25	0.7647	159.589	19.2298		84.1981
25.9612	25.9612	0.7941	157.285	20.1909		84.3166
26.9223	26.9223	0.8235	156.993	21.1521		84.3315
27.8835	27.8835	0.8529	152.861	22.1132		84.5439
28.8479	28.8479	0.8824	150.132	23.0777		84.6842
29.8091	29.8091	0.9118	150.397	24.0388		84.6706
30.7702	30.7702	0.9412	150	25	84.9224	84.691
31.7314	31.7314	0.9706	148.914	25.9612		84.7468
32.6926	32.6926	1	147.344	26.9223		84.8275
33.6537	33.6537	1.0294	147.205	27.8835		84.8346
34.6149	34.6149	1.0588	145.675	28.8446		84.9133
35.576	35.576	1.0882	145.583	29.8058		84.918
36.5372	36.5372	1.1176	145.384	30.767		84.9283
37.5016	37.5016	1.1471	142.775	31.7314		85.0624
38.4628	38.4628	1.1765	143.026	32.6926		85.0494
39.424	39.424	1.2059	141.649	33.6537		85.1202
40.3851	40.3851	1.2353	138.45	34.6149		85.2847
41.3463	41.3463	1.2647	138.126	35.576		85.3013
42.3074	42.3074	1.2941	138.166	36.5372		85.2993
43.2686	43.2686	1.3235	137.781	37.4984		85.319
44.2298	44.2298	1.3529	136.662	38.4595		85.3766
45.1942	45.1942	1.3824	135.073	39.424		85.4583
46.1554	46.1554	1.4118	133.437	40.3851		85.5423
47.1165	47.1165	1.4412	133.232	41.3463		85.5529
48.0777	48.0777	1.4706	133.146	42.3074		85.5573
49.0388	49.0388	1.5	133.94	43.2686		85.5165
50	50	1.5294	131.053	44.2298		85.6649
50.9612	50.9612	1.5588	129.318	45.1909		85.7541
51.9223	51.9223	1.5882	127.815	46.1521		85.8313
52.8835	52.8835	1.6176	129.199	47.1132		85.7602
53.8479	53.8479	1.6471	128.411	48.0777		85.8007
54.8091	54.8091	1.6765	125.834	49.0388		85.9331
55.7702	55.7702	1.7059	124.854	50		85.9835
56.7314	56.7314	1.7353	124.907	50.9612	85.8544	85.9808
57.6926	57.6926	1.7647	123.768	51.9223		86.0393
58.6537	58.6537	1.7941	123.172	52.8835		86.0699
59.6149	59.6149	1.8235	121.788	53.8446		86.1411
60.576	60.576	1.8529	122.477	54.8058		86.1057
61.5405	61.5405	1.8824	122.477	55.7702		86.1057
62.5016	62.5016	1.9118	120.371	56.7314		86.2139
63.4628	63.4628	1.9412	119.351	57.6926		86.2664
64.424	64.424	1.9706	118.325	58.6537		86.3191
65.3851	65.3851	2	120.821	59.6149		86.1908
66.3463	66.3463	2.0294	121.636	60.576		86.1489
67.3074	67.3074	2.0588	121.132	61.5372		86.1748
68.2686	68.2686	2.0882	118.411	62.4984		86.3147
69.2298	69.2298	2.1176	119.026	63.4595		86.283
70.1942	70.1942	2.1471	117.523	64.424		86.3603
71.1554	71.1554	2.1765	120.331	65.3851		86.216
72.1165	72.1165	2.2059	118.881	66.3463		86.2905
73.0777	73.0777	2.2353	120.404	67.3074		86.2122
74.0388	74.0388	2.2647	118.305	68.2686		86.3201
75	75	2.2941	116.536	69.2298		86.411
75.9612	75.9612	2.3235	116.709	70.1909		86.4022
76.9223	76.9223	2.3529	118.099	71.1521		86.3307
77.8868	77.8868	2.3824	117.344	72.1165		86.3695
78.8479	78.8479	2.4118	115.934	73.0777		86.442
79.8091	79.8091	2.4412	117.907	74.0388		86.3406
80.7702	80.7702	2.4706	116.53	75		86.4114
81.7314	81.7314	2.5	115.563	75.9612	86.3391	86.4611
82.6926	82.6926	2.5294	115.616	76.9223		86.4583
83.6537	83.6537	2.5588	116.96	77.8835		86.3892
84.6149	84.6149	2.5882	117.265	78.8446		86.3736
85.576	85.576	2.6176	117.358	79.8058		86.3688
86.5405	86.5405	2.6471	116.166	80.7702		86.4301
87.5016	87.5016	2.6765	113.536	81.7314		86.5652
88.4628	88.4628	2.7059	113.987	82.6926		86.5421
89.424	89.424	2.7353	113.649	83.6537		86.5594
90.3851	90.3851	2.7647	110.821	84.6149		86.7048
91.3463	91.3463	2.7941	113.093	85.576		86.588
92.3074	92.3074	2.8235	112.987	86.5372		86.5935
93.2686	93.2686	2.8529	112.603	87.4984		86.6132
94.233	94.233	2.8824	113.642	88.4628		86.5598
95.1942	95.1942	2.9118	113.854	89.424		86.5489
96.1554	96.1554	2.9412	115.669	90.3851		86.4556
97.1165	97.1165	2.9706	113.424	91.3463		86.571
98.0777	98.0777	3	114.576	92.3074		86.5118
99.0388	99.0388	3.0294	115.887	93.2686		86.4444
100	100	3.0588	115.132	94.2298		86.4832
100.961	100.961	3.0882	113.987	95.1909		86.5421
101.922	101.922	3.1176	114.834	96.1521		86.4985
102.887	102.887	3.1471	114.722	97.1165		86.5043
103.848	103.848	3.1765	113.517	98.0777		86.5662
104.809	104.809	3.2059	113.907	99.0388		86.5462
105.77	105.77	3.2353	115.901	100		86.4437
106.731	106.731	3.2647	114.656	100.961	86.6245	86.5077
107.693	107.693	3.2941	112.788	101.922		86.6037
108.654	108.654	3.3235	115.225	102.883		86.4784
109.615	109.615	3.3529	114.51	103.845		86.5152
110.579	110.579	3.3824	114.093	104.809		86.5366
111.54	111.54	3.4118	115.987	105.77		86.4393
112.502	112.502	3.4412	114.636	106.731		86.5087
113.463	113.463	3.4706	114.159	107.693		86.5332
114.424	114.424	3.5	114.583	108.654		86.5114
115.385	115.385	3.5294	113.887	109.615		86.5472
116.346	116.346	3.5588	113.848	110.576		86.5492
117.307	117.307	3.5882	113.55	111.537		86.5645
118.269	118.269	3.6176	112.391	112.498		86.6241
119.233	119.233	3.6471	113.887	113.463		86.5472
120.194	120.194	3.6765	114.868	114.424		86.4968
121.155	121.155	3.7059	114.536	115.385		86.5138
122.117	122.117	3.7353	115.623	116.346		86.458
123.078	123.078	3.7647	114.391	117.307		86.5213
124.039	124.039	3.7941	114.113	118.269		86.5356
125	125	3.8235	113.166	119.23		86.5843

## Sheet: Ep3_6
Distance from Crystal Edge (um)	Distance (um)	Distance (Arbitrary Units)	Greyscale (arbitrary units)	Distance from updated Crystal Edge (um)	Fo (See probe data workbook)	Calibrated Fo
50	0	0	91.9858	48.4151		87.509		Probe line length	Step
49.856	0.144034	0.0294	91.8507	48.2711		87.5151		48.26	12.065
49.7119	0.288069	0.0588	91.628	48.1271		87.5251
49.5674	0.432103	0.0882	92.0972	47.9825		87.504
49.4234	0.576137	0.1176	92.5735	47.8385		87.4827
49.2793	0.720662	0.1471	93.3033	47.6945		87.45
49.1353	0.864696	0.1765	93.1422	47.5504		87.4572
48.9913	1.00873	0.2059	93.5592	47.4064		87.4385
48.8472	1.15276	0.2353	94.2133	47.2624		87.4092
48.7032	1.2968	0.2647	94.6114	47.1183		87.3914
48.5592	1.44083	0.2941	94.2654	46.9743		87.4069
48.4151	1.58487	0.3235	94.4763	46.8303		87.3975
48.2706	1.7289	0.3529	93.846	46.6857		87.4257
48.1266	1.87343	0.3824	94.0142	46.5417		87.4182
47.9825	2.01746	0.4118	94.936	46.3977		87.3769
47.8385	2.16149	0.4412	94.9479	46.2536	87.5135	87.3763
47.6945	2.30553	0.4706	94.6303	46.1096		87.3906
47.5504	2.44956	0.5	94.3152	45.9656		87.4047
47.4064	2.5936	0.5294	93.8531	45.8215		87.4254
47.2624	2.73763	0.5588	93.9763	45.6775		87.4199
47.1178	2.88167	0.5882	93.1564	45.533		87.4566
46.9738	3.0257	0.6176	93.3744	45.3889		87.4468
46.8298	3.17023	0.6471	93.1588	45.2449		87.4565
46.6857	3.31426	0.6765	93.9858	45.1009		87.4194
46.5417	3.45829	0.7059	93.6208	44.9568		87.4358
46.3977	3.60233	0.7353	94.0521	44.8128		87.4165
46.2536	3.74636	0.7647	94.2014	44.6688		87.4098
46.1096	3.8904	0.7941	93.5545	44.5247		87.4388
45.9656	4.03443	0.8235	93.3365	44.3807		87.4485
45.821	4.17847	0.8529	93.5924	44.2362		87.4371
45.677	4.32299	0.8824	94.0427	44.0921		87.4169
45.533	4.46702	0.9118	93.5616	43.9481		87.4384
45.3889	4.61106	0.9412	92.5474	43.8041		87.4839
45.2449	4.75509	0.9706	92.7109	43.66		87.4766
45.1009	4.89913	1	93.4739	43.516		87.4424
44.9568	5.04316	1.0294	93.0142	43.372		87.463
44.8128	5.1872	1.0588	93.628	43.2279		87.4355
44.6683	5.33123	1.0882	93.3389	43.0834		87.4484
44.5242	5.47526	1.1176	93.4597	42.9394		87.443
44.3802	5.61979	1.1471	93.8223	42.7953		87.4268
44.2362	5.76382	1.1765	93.782	42.6513		87.4286
44.0921	5.90786	1.2059	93.3199	42.5073		87.4493
43.9481	6.05189	1.2353	93.3483	42.3632		87.448
43.8041	6.19593	1.2647	92.9929	42.2192		87.4639
43.66	6.33996	1.2941	92.9028	42.0752		87.468
43.516	6.48399	1.3235	93.1208	41.9311		87.4582
43.3715	6.62803	1.3529	92.4171	41.7866		87.4897
43.2274	6.77255	1.3824	92.8412	41.6426		87.4707
43.0834	6.91659	1.4118	92.2275	41.4985		87.4982
42.9394	7.06062	1.4412	92.9858	41.3545		87.4642
42.7953	7.20466	1.4706	92.5806	41.2105		87.4824
42.6513	7.34869	1.5	92.0806	41.0664		87.5048
42.5073	7.49272	1.5294	91.9218	40.9224		87.5119
42.3632	7.63676	1.5588	91.8365	40.7784		87.5157
42.2187	7.78079	1.5882	91.7844	40.6338		87.5181
42.0747	7.92483	1.6176	92.1588	40.4898		87.5013
41.9306	8.06935	1.6471	91.7109	40.3458		87.5214
41.7866	8.21339	1.6765	92.3175	40.2017		87.4942
41.6426	8.35742	1.7059	91.3792	40.0577		87.5362
41.4985	8.50146	1.7353	91.3246	39.9137		87.5387
41.3545	8.64549	1.7647	91.9834	39.7696		87.5091
41.2105	8.78952	1.7941	92.5237	39.6256		87.4849
41.0664	8.93356	1.8235	92.1588	39.4816		87.5013
40.9219	9.07759	1.8529	92.564	39.3371		87.4831
40.7779	9.22212	1.8824	92.5213	39.193		87.485
40.6338	9.36615	1.9118	92.0332	39.049		87.5069
40.4898	9.51019	1.9412	92.1351	38.9049		87.5023
40.3458	9.65422	1.9706	92.1019	38.7609		87.5038
40.2017	9.79825	2	92.1019	38.6169		87.5038
40.0577	9.94229	2.0294	92.7536	38.4728		87.4746
39.9137	10.0863	2.0588	92.6896	38.3288		87.4775
39.7692	10.2304	2.0882	92.7038	38.1843		87.4769
39.6251	10.3744	2.1176	93.4052	38.0403		87.4454
39.4811	10.5189	2.1471	93.1398	37.8962		87.4573
39.3371	10.6629	2.1765	92.7559	37.7522		87.4745
39.193	10.807	2.2059	92.1398	37.6081		87.5021
39.049	10.951	2.2353	92.8389	37.4641		87.4708
38.9049	11.0951	2.2647	93.41	37.3201		87.4452
38.7609	11.2391	2.2941	92.4408	37.176		87.4887
38.6169	11.3831	2.3235	91.8815	37.032		87.5137
38.4724	11.5272	2.3529	92.2512	36.8875		87.4971
38.3283	11.6717	2.3824	92.7749	36.7435		87.4737
38.1843	11.8157	2.4118	92.8318	36.5994		87.4711
38.0403	11.9597	2.4412	92.4645	36.4554		87.4876
37.8962	12.1038	2.4706	92.5308	36.3113		87.4846
37.7522	12.2478	2.5	93.0237	36.1673		87.4625
37.6081	12.3919	2.5294	93.2441	36.0233		87.4527
37.4641	12.5359	2.5588	93.0379	35.8792		87.4619
37.3196	12.6799	2.5882	92.8009	35.7347		87.4725
37.1756	12.824	2.6176	92.5071	35.5907		87.4857
37.0315	12.9685	2.6471	93.0308	35.4467		87.4622
36.8875	13.1125	2.6765	93.8152	35.3026		87.4271
36.7435	13.2565	2.7059	93.609	35.1586		87.4363
36.5994	13.4006	2.7353	93.7607	35.0146		87.4295
36.4554	13.5446	2.7647	93.3768	34.8705		87.4467
36.3113	13.6887	2.7941	92.7346	34.7265		87.4755
36.1673	13.8327	2.8235	92.6043	34.5824		87.4813
36.0228	13.9767	2.8529	93.154	34.4379		87.4567
35.8788	14.1212	2.8824	93.4502	34.2939		87.4434
35.7347	14.2653	2.9118	93.1919	34.1499	87.2837	87.455
35.5907	14.4093	2.9412	93.0308	34.0058		87.4622
35.4467	14.5533	2.9706	93.064	33.8618		87.4607
35.3026	14.6974	3	93.09	33.7178		87.4596
35.1586	14.8414	3.0294	93.9431	33.5737		87.4213
35.0146	14.9854	3.0588	93.5995	33.4297		87.4367
34.87	15.1295	3.0882	93.5118	33.2852		87.4407
34.726	15.2735	3.1176	93.1114	33.1411		87.4586
34.582	15.418	3.1471	92.9668	32.9971		87.4651
34.4379	15.5621	3.1765	92.4976	32.8531		87.4861
34.2939	15.7061	3.2059	92.7725	32.709		87.4738
34.1499	15.8501	3.2353	93.9668	32.565		87.4203
34.0058	15.9942	3.2647	94.4028	32.421		87.4008
33.8618	16.1382	3.2941	93.5237	32.2769		87.4401
33.7178	16.2822	3.3235	93.391	32.1329		87.4461
33.5732	16.4263	3.3529	93.3957	31.9884		87.4459
33.4292	16.5708	3.3824	93.7133	31.8443		87.4316
33.2852	16.7148	3.4118	93.9218	31.7003		87.4223
33.1411	16.8589	3.4412	93.1682	31.5563		87.4561
32.9971	17.0029	3.4706	92.6777	31.4122		87.478
32.8531	17.1469	3.5	92.5355	31.2682		87.4844
32.709	17.291	3.5294	92.4929	31.1242		87.4863
32.565	17.435	3.5588	92.9929	30.9801		87.4639
32.4205	17.579	3.5882	93.3957	30.8356		87.4459
32.2764	17.7231	3.6176	94.3578	30.6916		87.4028
32.1324	17.8676	3.6471	93.519	30.5475		87.4403
31.9884	18.0116	3.6765	93.1493	30.4035		87.4569
31.8443	18.1557	3.7059	94.4005	30.2595		87.4009
31.7003	18.2997	3.7353	94.5308	30.1154		87.395
31.5563	18.4437	3.7647	94.0498	29.9714		87.4166
31.4122	18.5878	3.7941	94.1493	29.8274		87.4121
31.2682	18.7318	3.8235	94.1232	29.6833		87.4133
31.1237	18.8758	3.8529	93.4455	29.5388		87.4436
30.9796	19.0204	3.8824	93.7654	29.3948		87.4293
30.8356	19.1644	3.9118	93.6161	29.2507		87.436
30.6916	19.3084	3.9412	94.0308	29.1067		87.4174
30.5475	19.4525	3.9706	93.5142	28.9627		87.4406
30.4035	19.5965	4	93.8602	28.8186		87.4251
30.2595	19.7405	4.0294	94.8957	28.6746		87.3787
30.1154	19.8846	4.0588	94.8436	28.5306		87.381
29.9709	20.0286	4.0882	95.2014	28.386		87.365
29.8269	20.1726	4.1176	94.981	28.242		87.3749
29.6828	20.3172	4.1471	95.3389	28.098		87.3588
29.5388	20.4612	4.1765	95.4716	27.9539		87.3529
29.3948	20.6052	4.2059	95.8389	27.8099		87.3364
29.2507	20.7493	4.2353	96.2844	27.6659		87.3165
29.1067	20.8933	4.2647	95.4028	27.5218		87.356
28.9627	21.0373	4.2941	95.8697	27.3778		87.335
28.8186	21.1814	4.3235	96.5095	27.2338		87.3064
28.6741	21.3254	4.3529	96.6991	27.0892		87.2979
28.5301	21.4699	4.3824	96.5118	26.9452		87.3063
28.386	21.614	4.4118	96.0118	26.8012		87.3287
28.242	21.758	4.4412	95.4194	26.6571		87.3552
28.098	21.902	4.4706	95.6896	26.5131		87.3431
27.9539	22.0461	4.5	95.7559	26.3691		87.3401
27.8099	22.1901	4.5294	96.0142	26.225		87.3286
27.6659	22.3341	4.5588	95.9289	26.081		87.3324
27.5213	22.4782	4.5882	96.7678	25.9365		87.2948
27.3773	22.6222	4.6176	96.3199	25.7924		87.3149
27.2333	22.7667	4.6471	95.3697	25.6484		87.3574
27.0892	22.9108	4.6765	96.6777	25.5044		87.2988
26.9452	23.0548	4.7059	95.846	25.3603		87.3361
26.8012	23.1988	4.7353	96.2654	25.2163		87.3173
26.6571	23.3429	4.7647	95.9976	25.0723		87.3293
26.5131	23.4869	4.7941	96.7085	24.9282		87.2975
26.3691	23.6309	4.8235	97.2488	24.7842		87.2733
26.2245	23.775	4.8529	96.6635	24.6397		87.2995
26.0805	23.9195	4.8824	97.6303	24.4956		87.2562
25.9365	24.0635	4.9118	97.6825	24.3516		87.2538
25.7924	24.2076	4.9412	97.6066	24.2076		87.2572
25.6484	24.3516	4.9706	97.154	24.0635		87.2775
25.5044	24.4956	5	97.4739	23.9195		87.2632
25.3603	24.6397	5.0294	97.4123	23.7755		87.2659
25.2163	24.7837	5.0588	97.5735	23.6314		87.2587
25.0718	24.9277	5.0882	98.5024	23.4869		87.2171
24.9277	25.0718	5.1176	98.218	23.3429		87.2298
24.7837	25.2163	5.1471	98.9716	23.1988		87.1961
24.6397	25.3603	5.1765	99.2891	23.0548		87.1818
24.4956	25.5044	5.2059	99.2062	22.9108		87.1856
24.3516	25.6484	5.2353	98.3602	22.7667		87.2235
24.2076	25.7924	5.2647	99.4431	22.6227		87.1749
24.0635	25.9365	5.2941	99.5853	22.4787		87.1686
23.9195	26.0805	5.3235	99.5166	22.3346		87.1717
23.775	26.2245	5.3529	99.6232	22.1901	87.2012	87.1669
23.6309	26.3691	5.3824	100.344	22.0461		87.1346
23.4869	26.5131	5.4118	100.467	21.902		87.1291
23.3429	26.6571	5.4412	100.235	21.758		87.1395
23.1988	26.8012	5.4706	99.8792	21.614		87.1554
23.0548	26.9452	5.5	99.8744	21.4699		87.1556
22.9108	27.0892	5.5294	99.9787	21.3259		87.151
22.7667	27.2333	5.5588	101.927	21.1819		87.0637
22.6222	27.3773	5.5882	102.566	21.0373		87.035
22.4782	27.5213	5.6176	102.019	20.8933		87.0595
22.3341	27.6659	5.6471	102.623	20.7493		87.0325
22.1901	27.8099	5.6765	101.768	20.6052		87.0708
22.0461	27.9539	5.7059	102.391	20.4612		87.0429
21.902	28.098	5.7353	103.1	20.3172		87.0111
21.758	28.242	5.7647	102.744	20.1731		87.0271
21.614	28.386	5.7941	103.386	20.0291		86.9983
21.4699	28.5301	5.8235	103.194	19.8851		87.0069
21.3254	28.6741	5.8529	102.68	19.7405		87.0299
21.1814	28.8186	5.8824	102.99	19.5965		87.016
21.0373	28.9627	5.9118	103.265	19.4525		87.0037
20.8933	29.1067	5.9412	104.417	19.3084		86.9521
20.7493	29.2507	5.9706	104.528	19.1644		86.9471
20.6052	29.3948	6	104.386	19.0204		86.9535
20.4612	29.5388	6.0294	105.237	18.8763		86.9154
20.3172	29.6828	6.0588	105.967	18.7323		86.8827
20.1726	29.8269	6.0882	105.495	18.5878		86.9038
20.0286	29.9709	6.1176	105.481	18.4437		86.9045
19.8846	30.1154	6.1471	105.908	18.2997		86.8853
19.7405	30.2595	6.1765	106.486	18.1557		86.8594
19.5965	30.4035	6.2059	106.526	18.0116		86.8576
19.4525	30.5475	6.2353	107.069	17.8676		86.8333
19.3084	30.6916	6.2647	107.882	17.7236		86.7969
19.1644	30.8356	6.2941	108.256	17.5795		86.7801
19.0204	30.9796	6.3235	108.308	17.4355		86.7778
18.8758	31.1237	6.3529	107.751	17.291		86.8027
18.7318	31.2682	6.3824	108.147	17.1469		86.785
18.5878	31.4122	6.4118	108.983	17.0029		86.7475
18.4437	31.5563	6.4412	108.329	16.8589		86.7768
18.2997	31.7003	6.4706	108.775	16.7148		86.7569
18.1557	31.8443	6.5	109.597	16.5708		86.72
18.0116	31.9884	6.5294	110.441	16.4268		86.6823
17.8676	32.1324	6.5588	111.441	16.2827		86.6375
17.7231	32.2764	6.5882	111.616	16.1382		86.6296
17.579	32.4205	6.6176	111.846	15.9942		86.6193
17.435	32.565	6.6471	111.713	15.8501		86.6252
17.291	32.709	6.6765	112.043	15.7061		86.6105
17.1469	32.8531	6.7059	112.82	15.5621		86.5757
17.0029	32.9971	6.7353	113.204	15.418		86.5585
16.8589	33.1411	6.7647	113.886	15.274		86.5279
16.7148	33.2852	6.7941	114.142	15.13		86.5164
16.5708	33.4292	6.8235	113.602	14.9859		86.5406
16.4263	33.5732	6.8529	114.486	14.8414		86.501
16.2822	33.7178	6.8824	115.256	14.6974		86.4665
16.1382	33.8618	6.9118	115.898	14.5533		86.4378
15.9942	34.0058	6.9412	117.438	14.4093		86.3688
15.8501	34.1499	6.9706	117.756	14.2653		86.3545
15.7061	34.2939	7	117.325	14.1212		86.3739
15.5621	34.4379	7.0294	118.242	13.9772		86.3328
15.418	34.582	7.0588	119.14	13.8332		86.2925
15.2735	34.726	7.0882	118.737	13.6887		86.3106
15.1295	34.87	7.1176	118.896	13.5446		86.3035
14.9854	35.0146	7.1471	119.69	13.4006		86.2679
14.8414	35.1586	7.1765	120.038	13.2565		86.2523
14.6974	35.3026	7.2059	119.96	13.1125		86.2558
14.5533	35.4467	7.2353	121.457	12.9685		86.1887
14.4093	35.5907	7.2647	122.379	12.8244		86.1474
14.2653	35.7347	7.2941	123.232	12.6804		86.1092
14.1212	35.8788	7.3235	123.893	12.5364		86.0796
13.9767	36.0228	7.3529	123.986	12.3919		86.0754
13.8327	36.1673	7.3824	125.187	12.2478		86.0216
13.6887	36.3113	7.4118	124.891	12.1038		86.0349
13.5446	36.4554	7.4412	124.898	11.9597		86.0346
13.4006	36.5994	7.4706	126.275	11.8157		85.9729
13.2565	36.7435	7.5	127.223	11.6717		85.9304
13.1125	36.8875	7.5294	127.301	11.5276		85.9269
12.9685	37.0315	7.5588	127.618	11.3836		85.9127
12.824	37.1756	7.5882	129.057	11.2391		85.8483
12.6799	37.3196	7.6176	128.344	11.0951		85.8802
12.5359	37.4641	7.6471	130.386	10.951		85.7887
12.3919	37.6081	7.6765	131.244	10.807		85.7503
12.2478	37.7522	7.7059	132.076	10.6629		85.713
12.1038	37.8962	7.7353	132.033	10.5189		85.7149
11.9597	38.0403	7.7647	132.87	10.3749		85.6774
11.8157	38.1843	7.7941	133.308	10.2308		85.6578
11.6717	38.3283	7.8235	133.339	10.0868	85.6386	85.6564
11.5272	38.4724	7.8529	134.844	9.94229		85.589
11.3831	38.6169	7.8824	136.633	9.79825		85.5089
11.2391	38.7609	7.9118	136.782	9.65422		85.5022
11.0951	38.9049	7.9412	137.348	9.51019		85.4768
10.951	39.049	7.9706	137.04	9.36615		85.4906
10.807	39.193	8	138.356	9.22212		85.4317
10.6629	39.3371	8.0294	138.931	9.07808		85.4059
10.5189	39.4811	8.0588	139.265	8.93405		85.3909
10.3744	39.6251	8.0882	140.18	8.78952		85.3499
10.2304	39.7692	8.1176	140.708	8.64549		85.3263
10.0863	39.9137	8.1471	141.559	8.50146		85.2881
9.94229	40.0577	8.1765	141.964	8.35742		85.27
9.79825	40.2017	8.2059	142.372	8.21339		85.2517
9.65422	40.3458	8.2353	142.592	8.06935		85.2419
9.51019	40.4898	8.2647	144.083	7.92532		85.1751
9.36615	40.6338	8.2941	145.403	7.78128		85.116
9.22212	40.7779	8.3235	146.066	7.63725		85.0862
9.07759	40.9219	8.3529	147.265	7.49272		85.0325
8.93356	41.0664	8.3824	148.934	7.34869		84.9578
8.78952	41.2105	8.4118	149.571	7.20466		84.9292
8.64549	41.3545	8.4412	150.374	7.06062		84.8932
8.50146	41.4985	8.4706	151.479	6.91659		84.8438
8.35742	41.6426	8.5	151.576	6.77255		84.8394
8.21339	41.7866	8.5294	152.72	6.62852		84.7881
8.06935	41.9306	8.5588	153.72	6.48448		84.7433
7.92483	42.0747	8.5882	154.372	6.33996		84.7141
7.78079	42.2187	8.6176	155.908	6.19593		84.6453
7.63676	42.3632	8.6471	156.751	6.05189		84.6075
7.49272	42.5073	8.6765	157.564	5.90786		84.5711
7.34869	42.6513	8.7059	157.317	5.76382		84.5822
7.20466	42.7953	8.7353	157.955	5.61979		84.5536
7.06062	42.9394	8.7647	158.955	5.47575		84.5088
6.91659	43.0834	8.7941	160.49	5.33172		84.44
6.77255	43.2274	8.8235	160.86	5.18769		84.4235
6.62803	43.3715	8.8529	161.161	5.04316		84.41
6.48399	43.516	8.8824	162.91	4.89913		84.3316
6.33996	43.66	8.9118	164.216	4.75509		84.2731
6.19593	43.8041	8.9412	165.047	4.61106		84.2359
6.05189	43.9481	8.9706	165.327	4.46702		84.2234
5.90786	44.0921	9	166.644	4.32299		84.1643
5.76382	44.2362	9.0294	166.822	4.17896		84.1564
5.61979	44.3802	9.0588	167.844	4.03492		84.1106
5.47526	44.5242	9.0882	169.472	3.8904		84.0377
5.33123	44.6683	9.1176	169.889	3.74636		84.019
5.1872	44.8128	9.1471	171.384	3.60233		83.952
5.04316	44.9568	9.1765	172.005	3.45829		83.9242
4.89913	45.1009	9.2059	173.19	3.31426		83.8711
4.75509	45.2449	9.2353	174.417	3.17023		83.8161
4.61106	45.3889	9.2647	175.436	3.02619		83.7705
4.46702	45.533	9.2941	176.429	2.88216		83.726
4.32299	45.677	9.3235	177.313	2.73812		83.6864
4.17847	45.821	9.3529	178.566	2.5936		83.6302
4.03443	45.9656	9.3824	178.879	2.44956		83.6162
3.8904	46.1096	9.4118	180.073	2.30553		83.5627
3.74636	46.2536	9.4412	181.931	2.16149		83.4795
3.60233	46.3977	9.4706	182.941	2.01746		83.4343
3.45829	46.5417	9.5	183.827	1.87343		83.3946
3.31426	46.6857	9.5294	185.348	1.72939		83.3264
3.17023	46.8298	9.5588	186.536	1.58536		83.2732
3.0257	46.9738	9.5882	186.609	1.44083		83.2699
2.88167	47.1178	9.6176	187.99	1.2968		83.208
2.73763	47.2624	9.6471	188.517	1.15276		83.1845
2.5936	47.4064	9.6765	189.339	1.00873		83.1476
2.44956	47.5504	9.7059	189.704	0.864696		83.1313
2.30553	47.6945	9.7353	190.796	0.720662		83.0823
2.16149	47.8385	9.7647	192.881	0.576627		82.9889
2.01746	47.9825	9.7941	193.602	0.432593		82.9566
1.87343	48.1266	9.8235	193.979	0.288559		82.9398
1.7289	48.2706	9.8529	194.941	0.144034		82.8967
1.58487	48.4151	9.8824	196.697	0		82.818
1.44083	48.5592	9.9118	198.832
1.2968	48.7032	9.9412	200.91
1.15276	48.8472	9.9706	204.6
1.00873	48.9913	10	208.422
0.864696	49.1353	10.0294	212.46
0.720662	49.2793	10.0588	217.701
0.576137	49.4234	10.0882	223.588
0.432103	49.5674	10.1176	230.559
0.288069	49.7119	10.1471	237.161
0.144034	49.856	10.1765	243.398
0	50	10.2059	248.344

## Sheet: Ep3_12
Distance	Distance (um)	D from edge (um)	Greyscale	Fo (See probe data workbook)	Calibrated Fo
0	0	247.693	40.2152		86.917
0.0294	1.1516	246.541	40.4304		86.9069
0.0588	2.30321	245.39	40.4051		86.9081
0.0882	3.45481	244.238	40.2911		86.9134
0.1176	4.60642	243.086	39.8861		86.9323
0.1471	5.76194	241.931	39.6835		86.9418
0.1765	6.91354	240.779	35.5443		87.1351
0.2059	8.06514	239.628	37.5443		87.0417
0.2353	9.21675	238.476	38.9494		86.9761
0.2647	10.3684	237.324	40.3165		86.9122
0.2941	11.52	236.173	39.4937		86.9506
0.3235	12.6716	235.021	39.7848		86.937
0.3529	13.8232	233.87	40.3418		86.911
0.3824	14.9787	232.714	39.8101		86.9359
0.4118	16.1303	231.562	39.4304		86.9536
0.4412	17.2819	230.411	39.0253		86.9725
0.4706	18.4335	229.259	37.4051		87.0482
0.5	19.5851	228.108	38.5823		86.9932
0.5294	20.7367	226.956	39.4177		86.9542
0.5588	21.8883	225.804	38.5823		86.9932
0.5882	23.0399	224.653	39.9747		86.9282
0.6176	24.1915	223.501	38.481		86.9979
0.6471	25.347	222.346	39.1519		86.9666
0.6765	26.4986	221.194	39.9747		86.9282
0.7059	27.6502	220.043	38.7468		86.9855
0.7353	28.8018	218.891	41.9494		86.836
0.7647	29.9535	217.739	41		86.8803
0.7941	31.1051	216.588	39.1772		86.9654
0.8235	32.2567	215.436	39.557		86.9477
0.8529	33.4083	214.284	39.9873		86.9276
0.8824	34.5638	213.129	38.8734		86.9796
0.9118	35.7154	211.977	39.2278		86.9631
0.9412	36.867	210.826	38.6076		86.992
0.9706	38.0186	209.674	37.5696		87.0405
1	39.1702	208.523	39.2911		86.9601
1.0294	40.3218	207.371	39.2152		86.9637
1.0588	41.4734	206.219	39.9367		86.93
1.0882	42.625	205.068	39.7975		86.9365
1.1176	43.7766	203.916	38.9494		86.9761
1.1471	44.9321	202.761	37.9367		87.0234
1.1765	46.0837	201.609	39		86.9737
1.2059	47.2353	200.457	41.4557		86.859
1.2353	48.3869	199.306	41.0253		86.8791
1.2647	49.5386	198.154	39.8734		86.9329
1.2941	50.6902	197.003	38.3924		87.0021
1.3235	51.8418	195.851	38.3291		87.005
1.3529	52.9934	194.699	40.6962		86.8945
1.3824	54.1489	193.544	40.519		86.9028
1.4118	55.3005	192.392	39.3165		86.9589
1.4412	56.4521	191.241	39.1519		86.9666
1.4706	57.6037	190.089	38.962		86.9755
1.5	58.7553	188.937	41.4304		86.8602
1.5294	59.9069	187.786	40.7342		86.8927
1.5588	61.0585	186.634	39.8101		86.9359
1.5882	62.2101	185.483	40.1266		86.9211
1.6176	63.3617	184.331	37.962		87.0222
1.6471	64.5172	183.176	38.3797		87.0027
1.6765	65.6688	182.024	41.6582		86.8496
1.7059	66.8204	180.872	39.443		86.953
1.7353	67.972	179.721	41.3165		86.8655
1.7647	69.1237	178.569	40.443		86.9063
1.7941	70.2753	177.418	39.1139		86.9684
1.8235	71.4269	176.266	40.7722		86.8909
1.8529	72.5785	175.114	39.1772		86.9654
1.8824	73.734	173.959	39.5443		86.9483
1.9118	74.8856	172.807	39.5443		86.9483
1.9412	76.0372	171.656	40.7089		86.8939
1.9706	77.1888	170.504	40.1139		86.9217
2	78.3404	169.352	40.8101		86.8892
2.0294	79.492	168.201	39.9114		86.9311
2.0588	80.6436	167.049	39.3418		86.9577
2.0882	81.7952	165.898	38.4051		87.0015
2.1176	82.9468	164.746	38.7975		86.9832
2.1471	84.1023	163.59	39.2785		86.9607
2.1765	85.2539	162.439	39.5316		86.9489
2.2059	86.4055	161.287	41.0127		86.8797
2.2353	87.5571	160.136	41.5063		86.8567
2.2647	88.7088	158.984	39.9367		86.93
2.2941	89.8604	157.832	39.9494		86.9294
2.3235	91.012	156.681	40.3924		86.9087
2.3529	92.1636	155.529	39.2152		86.9637
2.3824	93.3191	154.374	38.9873		86.9743
2.4118	94.4707	153.222	39.6709		86.9424
2.4412	95.6223	152.07	37.4051		87.0482
2.4706	96.7739	150.919	38.076		87.0169
2.5	97.9255	149.767	40.3797		86.9093
2.5294	99.0771	148.616	39.2278		86.9631
2.5588	100.229	147.464	39.8481		86.9341
2.5882	101.38	146.312	40.4177		86.9075
2.6176	102.532	145.161	39.5443		86.9483
2.6471	103.687	144.005	39.6076		86.9453
2.6765	104.839	142.854	40.3418		86.911
2.7059	105.991	141.702	40.8101		86.8892
2.7353	107.142	140.551	41.7468		86.8454
2.7647	108.294	139.399	44.038		86.7384
2.7941	109.445	138.247	42.8228		86.7952
2.8235	110.597	137.096	39.0506		86.9713
2.8529	111.749	135.944	38.5063		86.9968
2.8824	112.904	134.789	40.3671		86.9099
2.9118	114.056	133.637	39.6076		86.9453
2.9412	115.207	132.485	39.8734		86.9329
2.9706	116.359	131.334	39.2658		86.9613
3	117.511	130.182	38.2911		87.0068
3.0294	118.662	129.031	39.3165		86.9589
3.0588	119.814	127.879	40.9747		86.8815
3.0882	120.965	126.727	37.4684		87.0452
3.1176	122.117	125.576	40.5949		86.8992
3.1471	123.273	124.42	41.8987		86.8383
3.1765	124.424	123.269	39.8101		86.9359
3.2059	125.576	122.117	40.6076		86.8986
3.2353	126.727	120.965	40.4051		86.9081
3.2647	127.879	119.814	38.8481		86.9808
3.2941	129.031	118.662	39.8228		86.9353
3.3235	130.182	117.511	40.4684		86.9051
3.3529	131.334	116.359	41.1013		86.8756
3.3824	132.489	115.203	39.7089		86.9406
3.4118	133.641	114.052	40.4937		86.9039
3.4412	134.792	112.9	42.5696		86.807
3.4706	135.944	111.749	40.9747		86.8815
3.5	137.096	110.597	41.3165		86.8655
3.5294	138.247	109.445	40.9747		86.8815
3.5588	139.399	108.294	40.6456		86.8969
3.5882	140.551	107.142	41.4177		86.8608
3.6176	141.702	105.991	43.3797		86.7692
3.6471	142.858	104.835	44.2152		86.7302
3.6765	144.009	103.684	44.4557		86.7189
3.7059	145.161	102.532	41.4937		86.8572
3.7353	146.312	101.38	41.1519		86.8732
3.7647	147.464	100.229	42.1266		86.8277
3.7941	148.616	99.0771	43.6329		86.7573
3.8235	149.767	97.9255	43.3291	86.7234	86.7715
3.8529	150.919	96.7739	44.3797		86.7225
3.8824	152.074	95.6184	42.9114		86.791
3.9118	153.226	94.4668	44.4684		86.7183
3.9412	154.378	93.3152	43.1266		86.781
3.9706	155.529	92.1636	46.962		86.6019
4	156.681	91.012	43.0253		86.7857
4.0294	157.832	89.8604	45.6456		86.6634
4.0588	158.984	88.7088	45.7215		86.6598
4.0882	160.136	87.5571	45.7975		86.6563
4.1176	161.287	86.4055	46.2785		86.6338
4.1471	162.443	85.25	45.7342		86.6592
4.1765	163.594	84.0984	46.1772		86.6385
4.2059	164.746	82.9468	44.7975		86.703
4.2353	165.898	81.7952	46.7722		86.6107
4.2647	167.049	80.6436	47.5316		86.5753
4.2941	168.201	79.492	48.8101		86.5156
4.3235	169.352	78.3404	50.443		86.4393
4.3529	170.504	77.1888	47.6582		86.5694
4.3824	171.659	76.0333	47.8481		86.5605
4.4118	172.811	74.8817	47.9114		86.5575
4.4412	173.963	73.7301	48.9873	86.4692	86.5073
4.4706	175.114	72.5785	48.9367		86.5097
4.5	176.266	71.4269	50.1772		86.4517
4.5294	177.418	70.2753	52.1899		86.3577
4.5588	178.569	69.1237	53.3671		86.3028
4.5882	179.721	67.972	55.3544		86.2099
4.6176	180.872	66.8204	54.8608		86.233
4.6471	182.028	65.6649	56.0886		86.1757
4.6765	183.179	64.5133	55.8228		86.1881
4.7059	184.331	63.3617	56.0886		86.1757
4.7353	185.483	62.2101	55.0127		86.2259
4.7647	186.634	61.0585	57.7089		86.1
4.7941	187.786	59.9069	59.7342		86.0054
4.8235	188.937	58.7553	61.2152		85.9363
4.8529	190.089	57.6037	61.5949		85.9185
4.8824	191.245	56.4482	60.5316		85.9682
4.9118	192.396	55.2966	59.3924		86.0214
4.9412	193.548	54.145	63.0127		85.8523
4.9706	194.699	52.9934	64.924		85.763
5	195.851	51.8418	64.4051		85.7873
5.0294	197.003	50.6902	65.8354		85.7205
5.0588	198.154	49.5386	67.7089	85.6983	85.633
5.0882	199.306	48.3869	67.7468		85.6312
5.1176	200.457	47.2353	71.6203		85.4503
5.1471	201.613	46.0798	72.7975		85.3954
5.1765	202.765	44.9282	72.5443		85.4072
5.2059	203.916	43.7766	74.6835		85.3073
5.2353	205.068	42.625	75.5316		85.2677
5.2647	206.219	41.4734	75.557		85.2665
5.2941	207.371	40.3218	76.9494		85.2015
5.3235	208.523	39.1702	81.7089		84.9792
5.3529	209.674	38.0186	80.3165		85.0442
5.3824	210.83	36.8631	81.2911		84.9987
5.4118	211.981	35.7115	83.3544		84.9023
5.4412	213.133	34.5599	83.962		84.874
5.4706	214.284	33.4083	85.3291		84.8101
5.5	215.436	32.2567	86.5696		84.7522
5.5294	216.588	31.1051	89.1013		84.634
5.5588	217.739	29.9535	93.1392		84.4454
5.5882	218.891	28.8018	93.2152		84.4419
5.6176	220.043	27.6502	94.4684		84.3833
5.6471	221.198	26.4947	97.2405		84.2539
5.6765	222.35	25.3431	98.3418		84.2024
5.7059	223.501	24.1915	98.1266	84.3127	84.2125
5.7353	224.653	23.0399	102.772		83.9955
5.7647	225.804	21.8883	105.291		83.8779
5.7941	226.956	20.7367	104.317		83.9234
5.8235	228.108	19.5851	106.101		83.8401
5.8529	229.259	18.4335	108.152		83.7443
5.8824	230.415	17.278	109.456		83.6834
5.9118	231.566	16.1264	110.532		83.6332
5.9412	232.718	14.9748	111.38		83.5936
5.9706	233.87	13.8232	116.582		83.3506
6	235.021	12.6716	117.81		83.2933
6.0294	236.173	11.52	118.532		83.2596
6.0588	237.324	10.3684	118.152		83.2773
6.0882	238.476	9.21675	122.329		83.0822
6.1176	239.628	8.06514	123.734		83.0166
6.1471	240.783	6.90962	124.19		82.9953
6.1765	241.935	5.75802	127.152		82.857
6.2059	243.086	4.60642	127.949		82.8198
6.2353	244.238	3.45481	129.253		82.7589				Probe line length	Step
6.2647	245.39	2.30321	132.468		82.6087				97.581	24.3953
6.2941	246.541	1.1516	133.43		82.5638
6.3235	247.693	0	131.608	82.572	82.6489
6.3529	248.844
6.3824	250

## Sheet: Ep3_16
Distance from Crystal Edge (um)	Distance (um)	Distance (Arbitrary Units)	Greyscale (arbitrary units)	Distance from updated Crystal Edge (um)	Fo (See probe data workbook)	Calibrated Fo
125	0	0	111.507	119.794		86.608		Probe line length	Step
123.265	1.73546	0.0294	111.145	118.058		86.6246		112.361	28.0903
121.529	3.47091	0.0588	111.594	116.323		86.604
119.794	5.20637	0.0882	111.304	114.587		86.6173
118.058	6.94182	0.1176	111.319	112.852		86.6166
116.323	8.68318	0.1471	110.826	111.116		86.6392
114.587	10.4186	0.1765	111.42	109.381	86.5902	86.612
112.852	12.1541	0.2059	111.812	107.645		86.594
111.116	13.8895	0.2353	113.116	105.91		86.5343
109.375	15.625	0.2647	112.58	104.169		86.5588
107.64	17.3605	0.2941	111.232	102.433		86.6206
105.904	19.0959	0.3235	109.565	100.698		86.6969
104.169	20.8314	0.3529	109.493	98.9623		86.7002
102.433	22.5727	0.3824	109.754	97.2268		86.6883
100.698	24.3082	0.4118	112.551	95.4914		86.5602
98.9623	26.0436	0.4412	115.377	93.7559		86.4307
97.2268	27.7791	0.4706	110.797	92.0204		86.6405
95.4855	29.5145	0.5	108.145	90.2791		86.762
93.75	31.25	0.5294	109.304	88.5436		86.7089
92.0145	32.9855	0.5588	110.449	86.8082		86.6564
90.2791	34.7209	0.5882	107.884	85.0727		86.7739
88.5436	36.4564	0.6176	106.145	83.3373	86.9155	86.8536
86.8082	38.1977	0.6471	105.696	81.6018		86.8741
85.0727	39.9332	0.6765	105.435	79.8664		86.8861
83.3373	41.6686	0.7059	104.826	78.1309		86.914
81.6018	43.4041	0.7353	103.449	76.3954		86.977
79.8605	45.1395	0.7647	105.623	74.6541		86.8775
78.125	46.875	0.7941	106.261	72.9186		86.8483
76.3895	48.6105	0.8235	105.696	71.1832		86.8741
74.6541	50.3459	0.8529	105.942	69.4477		86.8629
72.9186	52.0873	0.8824	107.203	67.7123		86.8051
71.1832	53.8227	0.9118	106.29	65.9768		86.8469
69.4477	55.5582	0.9412	104.884	64.2414		86.9113
67.7123	57.2936	0.9706	102.971	62.5059		86.9989
65.9709	59.0291	1	106.174	60.7645		86.8522
64.2355	60.7645	1.0294	105.957	59.0291		86.8622
62.5	62.5	1.0588	105.188	57.2936		86.8974
60.7645	64.2355	1.0882	104.29	55.5582		86.9385
59.0291	65.9709	1.1176	106	53.8227	86.8227	86.8602
57.2936	67.7123	1.1471	108.464	52.0873		86.7474
55.5582	69.4477	1.1765	110	50.3518		86.677
53.8227	71.1832	1.2059	109.188	48.6164		86.7142
52.0873	72.9186	1.2353	109.638	46.8809		86.6936
50.3459	74.6541	1.2647	114.217	45.1395		86.4838
48.6105	76.3895	1.2941	116.275	43.4041		86.3896
46.875	78.125	1.3235	114.087	41.6686		86.4898
45.1395	79.8605	1.3529	119.667	39.9332		86.2343
43.4041	81.6018	1.3824	119.536	38.1977		86.2402
41.6686	83.3373	1.4118	121.406	36.4623		86.1546
39.9332	85.0727	1.4412	125.681	34.7268		85.9588
38.1977	86.8082	1.4706	126.333	32.9914		85.9289
36.4564	88.5436	1.5	129.116	31.25		85.8015
34.7209	90.2791	1.5294	134.101	29.5145		85.5732
32.9855	92.0145	1.5588	134.391	27.7791		85.5599
31.25	93.75	1.5882	139.986	26.0436	85.3098	85.3037
29.5145	95.4855	1.6176	144.188	24.3082		85.1112
27.7791	97.2268	1.6471	146.696	22.5727		84.9963
26.0436	98.9623	1.6765	149.377	20.8373		84.8735
24.3082	100.698	1.7059	156.406	19.1018		84.5516
22.5727	102.433	1.7353	157.971	17.3664		84.4799
20.8314	104.169	1.7647	158.739	15.625		84.4447
19.0959	105.904	1.7941	163.841	13.8895		84.2111
17.3605	107.64	1.8235	163.377	12.1541		84.2323
15.625	109.375	1.8529	166.667	10.4186		84.0817
13.8895	111.116	1.8824	171.797	8.68318		83.8467
12.1541	112.852	1.9118	177.391	6.94772		83.5905
10.4186	114.587	1.9412	177.957	5.21227		83.5646
8.68318	116.323	1.9706	183.609	3.47681		83.3057
6.94182	118.058	2	184.246	1.73546		83.2765
5.20637	119.794	2.0294	185.957	0		83.1982
3.47091	121.529	2.0588	217.043
1.73546	123.265	2.0882	238.159
0	125	2.1176	246.449

## Sheet: Ep3_17
Distance from Crystal Edge (um)	Distance (um)	Distance (Arbitrary Units)	Greyscale (arbitrary units)	Distance from updated Crystal Edge (um)	Fo (See probe data workbook)	Calibrated Fo
125	0	0	83.2143	118.336		87.3776		Probe line length	Step
123.334	1.66599	0.0294	84.1429	116.67		87.3284		109.385	27.3463
121.668	3.33197	0.0588	85.131	115.004		87.2761
119.996	4.99796	0.0882	84.9405	113.332		87.2862
118.33	6.66395	0.1176	84.0595	111.666		87.3328
116.664	8.3356	0.1471	84.9048	110	87.1102	87.288
114.998	10.0016	0.1765	84.631	108.334		87.3026
113.332	11.6676	0.2059	85.0357	106.668		87.2811
111.666	13.3336	0.2353	84.6905	105.002		87.2994
110	14.9995	0.2647	86.4048	103.337		87.2085
108.334	16.6655	0.2941	86.2976	101.671		87.2142
106.668	18.3315	0.3235	88.3095	100.005		87.1076
104.997	19.9975	0.3529	87.5	98.3329		87.1505
103.331	21.6692	0.3824	87.25	96.6669		87.1637
101.665	23.3351	0.4118	88.619	95.0009		87.0912
99.9989	25.0011	0.4412	88.119	93.3349		87.1177
98.3329	26.6671	0.4706	88.6667	91.6689		87.0887
96.6669	28.3331	0.5	90.9048	90.0029		86.97
95.0009	29.9991	0.5294	92.4048	88.337		86.8905
93.3349	31.6651	0.5588	90.7857	86.671		86.9764
91.6633	33.3311	0.5882	92.1429	84.9993		86.9044
89.9973	34.9971	0.6176	93.869	83.3333		86.8129
88.3313	36.6687	0.6471	95.6667	81.6673	86.9022	86.7177
86.6653	38.3347	0.6765	95.4167	80.0014		86.7309
84.9993	40.0007	0.7059	96.1429	78.3354		86.6924
83.3333	41.6667	0.7353	96.1905	76.6694		86.6899
81.6673	43.3327	0.7647	97.2381	75.0034		86.6344
80.0014	44.9986	0.7941	98.4405	73.3374		86.5707
78.3354	46.6646	0.8235	101.893	71.6714		86.3877
76.6637	48.3306	0.8529	103.083	69.9998		86.3246
74.9977	50.0023	0.8824	100.476	68.3338		86.4628
73.3317	51.6683	0.9118	102.726	66.6678		86.3435
71.6658	53.3342	0.9412	103.786	65.0018		86.2874
69.9998	55.0002	0.9706	104.679	63.3358		86.24
68.3338	56.6662	1	106.167	61.6698		86.1612
66.6678	58.3322	1.0294	107.083	60.0039		86.1126
65.0018	59.9982	1.0588	110.631	58.3379		85.9246
63.3302	61.6642	1.0882	109.095	56.6662		86.006
61.6642	63.3302	1.1176	111.548	55.0002	86.0468	85.876
59.9982	65.0018	1.1471	115.048	53.3342		85.6905
58.3322	66.6678	1.1765	116.821	51.6683		85.5965
56.6662	68.3338	1.2059	117.286	50.0023		85.5719
55.0002	69.9998	1.2353	116.714	48.3363		85.6021
53.3342	71.6658	1.2647	120.845	46.6703		85.3832
51.6683	73.3317	1.2941	122.702	45.0043		85.2848
50.0023	74.9977	1.3235	122.559	43.3383		85.2923
48.3306	76.6637	1.3529	124.583	41.6667		85.1851
46.6646	78.3354	1.3824	126.929	40.0007		85.0608
44.9986	80.0014	1.4118	128.94	38.3347		84.9542
43.3327	81.6673	1.4412	130.702	36.6687		84.8608
41.6667	83.3333	1.4706	133.071	35.0027		84.7352
40.0007	84.9993	1.5	133.619	33.3367		84.7062
38.3347	86.6653	1.5294	134.476	31.6707		84.6608
36.6687	88.3313	1.5588	142.631	30.0048		84.2286
34.9971	89.9973	1.5882	142.905	28.3331	83.9689	84.214
33.3311	91.6633	1.6176	145.107	26.6671		84.0973
31.6651	93.3349	1.6471	146.19	25.0011		84.0399
29.9991	95.0009	1.6765	147.714	23.3351		83.9591
28.3331	96.6669	1.7059	149.214	21.6692		83.8796
26.6671	98.3329	1.7353	153.476	20.0032		83.6538
25.0011	99.9989	1.7647	156.274	18.3372		83.5055
23.3351	101.665	1.7941	158.393	16.6712		83.3932
21.6692	103.331	1.8235	160.214	15.0052		83.2966
19.9975	104.997	1.8529	164.155	13.3336		83.0878
18.3315	106.668	1.8824	165.083	11.6676		83.0386
16.6655	108.334	1.9118	165.429	10.0016		83.0203
14.9995	110	1.9412	166.274	8.3356		82.9755
13.3336	111.666	1.9706	167.655	6.66961		82.9023
11.6676	113.332	2	172.512	5.00363		82.6449
10.0016	114.998	2.0294	174.44	3.33764		82.5427
8.3356	116.664	2.0588	176.845	1.67165		82.4152
6.66395	118.33	2.0882	179.25	0	82.3836	82.2878
4.99796	119.996	2.1176	193.952
3.33197	121.668	2.1471	218.202
1.66599	123.334	2.1765	240.131
0	125	2.2059	248.429

## Sheet: Ep3_23
Distance from Crystal Edge (um)	Distance (um)	Distance (Arbitrary Units)	Greyscale (arbitrary units)	Distance from updated Crystal Edge (um)	Fo (See probe data workbook)	Calibrated Fo
0	0	0	129.304					Probe line length	Step
1.54256	1.54256	0.0294	121.784					111.879	27.9698
3.08512	3.08512	0.0588	116.016
4.62769	4.62769	0.0882	110.552	0	83.0262	83.0863
6.17025	6.17025	0.1176	104.232	1.54256		83.9306
7.71806	7.71806	0.1471	98.568	3.09037		84.6873
9.26062	9.26062	0.1765	94.984	4.63293		85.1661
10.8032	10.8032	0.2059	91.2	6.1755		85.6717
12.3457	12.3457	0.2353	89.328	7.71806		85.9218
13.8883	13.8883	0.2647	86.84	9.26062		86.2542
15.4309	15.4309	0.2941	85.384	10.8032		86.4487
16.9734	16.9734	0.3235	83.128	12.3457		86.7501
18.516	18.516	0.3529	80.792	13.8883		87.0622
20.0638	20.0638	0.3824	78.664	15.4361		87.3465
21.6064	21.6064	0.4118	77.632	16.9787		87.4844
23.1489	23.1489	0.4412	78.088	18.5212		87.4234
24.6915	24.6915	0.4706	77.664	20.0638		87.4801
26.234	26.234	0.5	77.936	21.6064		87.4438
27.7766	27.7766	0.5294	75.688	23.1489		87.7441
29.3192	29.3192	0.5588	75.52	24.6915		87.7665
30.8617	30.8617	0.5882	74.232	26.234		87.9386
32.4043	32.4043	0.6176	75.392	27.7766	87.2358	87.7836
33.9521	33.9521	0.6471	74.76	29.3244		87.8681
35.4947	35.4947	0.6765	74	30.867		87.9696
37.0372	37.0372	0.7059	74.456	32.4095		87.9087
38.5798	38.5798	0.7353	73.504	33.9521		88.0359
40.1224	40.1224	0.7647	73.36	35.4947		88.0551
41.6649	41.6649	0.7941	73.16	37.0372		88.0818
43.2075	43.2075	0.8235	73.664	38.5798		88.0145
44.75	44.75	0.8529	74.816	40.1224		87.8606
46.2979	46.2979	0.8824	76.832	41.6702		87.5912
47.8404	47.8404	0.9118	76.192	43.2127		87.6767
49.383	49.383	0.9412	75.896	44.7553		87.7163
50.9255	50.9255	0.9706	76.016	46.2979		87.7003
52.4681	52.4681	1	75.608	47.8404		87.7548
54.0107	54.0107	1.0294	76.104	49.383		87.6885
55.5532	55.5532	1.0588	76.368	50.9255		87.6532
57.0958	57.0958	1.0882	76.976	52.4681		87.572
58.6383	58.6383	1.1176	78	54.0107		87.4352
60.1862	60.1862	1.1471	77.48	55.5585	87.6047	87.5047
61.7287	61.7287	1.1765	78.432	57.101		87.3775
63.2713	63.2713	1.2059	79.24	58.6436		87.2695
64.8138	64.8138	1.2353	79.16	60.1862		87.2802
66.3564	66.3564	1.2647	78.76	61.7287		87.3337
67.899	67.899	1.2941	78.752	63.2713		87.3347
69.4415	69.4415	1.3235	76.504	64.8138		87.6351
70.9841	70.9841	1.3529	77.888	66.3564		87.4502
72.5319	72.5319	1.3824	80.352	67.9042		87.121
74.0745	74.0745	1.4118	79.168	69.4468		87.2792
75.617	75.617	1.4412	78.456	70.9893		87.3743
77.1596	77.1596	1.4706	79.432	72.5319		87.2439
78.7021	78.7021	1.5	78.552	74.0745		87.3615
80.2447	80.2447	1.5294	78.504	75.617		87.3679
81.7873	81.7873	1.5588	79.36	77.1596		87.2535
83.3298	83.3298	1.5882	80.136	78.7021		87.1498
84.8724	84.8724	1.6176	79.248	80.2447		87.2685
86.4202	86.4202	1.6471	78.856	81.7925		87.3208
87.9628	87.9628	1.6765	77.744	83.3351	87.6274	87.4694
89.5053	89.5053	1.7059	78.304	84.8776		87.3946
91.0479	91.0479	1.7353	79.928	86.4202		87.1776
92.5905	92.5905	1.7647	78.888	87.9628		87.3166
94.133	94.133	1.7941	78.632	89.5053		87.3508
95.6756	95.6756	1.8235	77.624	91.0479		87.4854
97.2181	97.2181	1.8529	77.4	92.5905		87.5154
98.766	98.766	1.8824	80.448	94.1383		87.1081
100.309	100.309	1.9118	82.12	95.6808		86.8848
101.851	101.851	1.9412	82.84	97.2234		86.7886
103.394	103.394	1.9706	82.408	98.766		86.8463
104.936	104.936	2	80.152	100.309		87.1477
106.479	106.479	2.0294	80.624	101.851		87.0846
108.021	108.021	2.0588	78.032	103.394		87.4309
109.564	109.564	2.0882	79.784	104.936		87.1969
111.106	111.106	2.1176	80.176	106.479		87.1445
112.654	112.654	2.1471	79.568	108.027		87.2257
114.197	114.197	2.1765	79.616	109.569		87.2193
115.739	115.739	2.2059	79.552	111.112	87.5668	87.2279
117.282	117.282	2.2353	79.264	112.654		87.2663
118.825	118.825	2.2647	77.32	114.197		87.526
120.367	120.367	2.2941	77.808	115.739		87.4609
121.91	121.91	2.3235	78.688	117.282		87.3433
123.452	123.452	2.3529	78.824	118.825		87.3251
125	125	2.3824	77.376	120.372		87.5186

## Sheet: Ep3_25
Distance	Distance (um)	D from edge (um)	Greyscale	Fo (See probe data workbook)	Calibrated Fo
0	0	146.782	94.1014		86.9077
0.0294	0.178713	146.603	93.9493		86.9147
0.0588	0.357425	146.425	94		86.9124
0.0882	0.536138	146.246	94.2391		86.9014
0.1176	0.71485	146.067	93.9928		86.9127
0.1471	0.894171	145.888	92.6377		86.9749
0.1765	1.07288	145.709	94.7319		86.8788
0.2059	1.2516	145.53	95.1957		86.8575
0.2353	1.43031	145.352	93.7174		86.9254
0.2647	1.60902	145.173	94.2464		86.9011
0.2941	1.78773	144.994	95.1667		86.8588
0.3235	1.96645	144.816	94		86.9124
0.3529	2.14516	144.637	94.0507		86.9101
0.3824	2.32448	144.457	95.8188		86.8289
0.4118	2.50319	144.279	94.5942		86.8851
0.4412	2.6819	144.1	94.7754		86.8768
0.4706	2.86062	143.921	96.5145		86.797
0.5	3.03933	143.743	95.8188		86.8289
0.5294	3.21804	143.564	93.7464		86.924
0.5588	3.39675	143.385	93.3841		86.9407
0.5882	3.57547	143.206	94.558		86.8868
0.6176	3.75418	143.028	96.2971		86.807
0.6471	3.9335	142.848	95.1232		86.8608
0.6765	4.11221	142.67	95.4348		86.8465
0.7059	4.29092	142.491	95.3696		86.8495
0.7353	4.46964	142.312	93.8986		86.9171
0.7647	4.64835	142.134	95.8261		86.8286
0.7941	4.82706	141.955	96.0507		86.8183
0.8235	5.00577	141.776	96.1304		86.8146
0.8529	5.18449	141.597	97.5942		86.7474
0.8824	5.36381	141.418	96.587		86.7937
0.9118	5.54252	141.239	97.0217		86.7737
0.9412	5.72123	141.061	97.3406		86.7591
0.9706	5.89995	140.882	94.2246		86.9021					Probe line length	Step
1	6.07866	140.703	95.4493		86.8459					97.617	24.4043
1.0294	6.25737	140.525	96.8478		86.7817
1.0588	6.43608	140.346	97.4638		86.7534
1.0882	6.6148	140.167	95.442		86.8462					24.4043
1.1176	6.79351	139.988	95.3841		86.8489					48.8085
1.1471	6.97283	139.809	95.3261		86.8515					73.2127
1.1765	7.15154	139.63	95.8406		86.8279					97.617
1.2059	7.33025	139.452	97.1159		86.7694					122.021
1.2353	7.50897	139.273	96.029		86.8193
1.2647	7.68768	139.094	96.3478		86.8046
1.2941	7.86639	138.916	96.7754		86.785
1.3235	8.0451	138.737	97.5072		86.7514
1.3529	8.22382	138.558	97.5217		86.7508
1.3824	8.40314	138.379	95.9203		86.8243
1.4118	8.58185	138.2	96.3551		86.8043
1.4412	8.76056	138.021	96.4348		86.8006
1.4706	8.93927	137.843	95.5652		86.8406
1.5	9.11799	137.664	94.9783		86.8675
1.5294	9.2967	137.485	96.2536		86.809
1.5588	9.47541	137.307	96.5362		86.796
1.5882	9.65412	137.128	96.1014		86.8159
1.6176	9.83284	136.949	95.3478		86.8505
1.6471	10.0122	136.77	95.7174		86.8336
1.6765	10.1909	136.591	95.8913		86.8256
1.7059	10.3696	136.412	95.5072		86.8432
1.7353	10.5483	136.234	96.8986		86.7794
1.7647	10.727	136.055	98.0942		86.7245
1.7941	10.9057	135.876	97.9348		86.7318
1.8235	11.0844	135.698	97.3478		86.7587
1.8529	11.2631	135.519	96.1667		86.8129
1.8824	11.4425	135.339	95.7391		86.8326
1.9118	11.6212	135.161	96.1667		86.8129
1.9412	11.7999	134.982	96.5145		86.797
1.9706	11.9786	134.803	96.1594		86.8133
2	12.1573	134.625	97.2029		86.7654
2.0294	12.336	134.446	97.3116		86.7604
2.0588	12.5147	134.267	97.4493		86.7541
2.0882	12.6935	134.089	96.5072		86.7973
2.1176	12.8722	133.91	96.3116		86.8063
2.1471	13.0515	133.73	97.7029		86.7424
2.1765	13.2302	133.552	96.8551		86.7814
2.2059	13.4089	133.373	97.2464		86.7634
2.2353	13.5876	133.194	97.1304		86.7687
2.2647	13.7663	133.016	97.8913		86.7338
2.2941	13.945	132.837	96.1522		86.8136
2.3235	14.1238	132.658	97.5507		86.7494
2.3529	14.3025	132.479	96.529		86.7963
2.3824	14.4818	132.3	96.8768		86.7804
2.4118	14.6605	132.121	97.9275		86.7321
2.4412	14.8392	131.943	98.2029		86.7195
2.4706	15.0179	131.764	97.8478		86.7358
2.5	15.1966	131.585	97.5942		86.7474
2.5294	15.3754	131.407	96.9203		86.7784
2.5588	15.5541	131.228	98.7754		86.6932
2.5882	15.7328	131.049	98.1232		86.7231
2.6176	15.9115	130.87	98.5652		86.7029
2.6471	16.0908	130.691	98.2536		86.7172
2.6765	16.2695	130.512	97.0797		86.771
2.7059	16.4482	130.334	97.4493		86.7541
2.7353	16.627	130.155	98.4565		86.7078
2.7647	16.8057	129.976	97.587		86.7478
2.7941	16.9844	129.798	97.029		86.7734
2.8235	17.1631	129.619	97.0797		86.771
2.8529	17.3418	129.44	98.7029		86.6965
2.8824	17.5211	129.261	98.4638		86.7075
2.9118	17.6998	129.082	98.3261		86.7138
2.9412	17.8785	128.903	96.8696		86.7807
2.9706	18.0573	128.725	97.942		86.7315
3	18.236	128.546	99.4855		86.6606
3.0294	18.4147	128.367	99.1594		86.6756
3.0588	18.5934	128.189	97.2899		86.7614
3.0882	18.7721	128.01	97.8913		86.7338
3.1176	18.9508	127.831	97.6377		86.7454
3.1471	19.1301	127.652	99.3551		86.6666
3.1765	19.3089	127.473	97.7681		86.7394
3.2059	19.4876	127.294	98.3261		86.7138
3.2353	19.6663	127.116	99.3841		86.6653
3.2647	19.845	126.937	99.8261		86.645
3.2941	20.0237	126.758	99.5652		86.657
3.3235	20.2024	126.58	99.058		86.6802
3.3529	20.3811	126.401	98.9638		86.6846
3.3824	20.5605	126.222	98.5507		86.7035
3.4118	20.7392	126.043	97.5797		86.7481
3.4412	20.9179	125.864	97.3768		86.7574
3.4706	21.0966	125.685	100.073		86.6337
3.5	21.2753	125.507	99.1087		86.6779
3.5294	21.454	125.328	97.5725		86.7484
3.5588	21.6327	125.149	97.4203		86.7554
3.5882	21.8114	124.971	98.471		86.7072
3.6176	21.9902	124.792	98.4565		86.7078
3.6471	22.1695	124.612	98.6087		86.7009
3.6765	22.3482	124.434	98.1087		86.7238
3.7059	22.5269	124.255	98.6449		86.6992
3.7353	22.7056	124.076	98.3116		86.7145
3.7647	22.8843	123.898	98.9855		86.6836
3.7941	23.063	123.719	98.1667		86.7211
3.8235	23.2417	123.54	99.5725		86.6566
3.8529	23.4205	123.361	96.587		86.7937
3.8824	23.5998	123.182	98.1014		86.7241
3.9118	23.7785	123.003	98.5		86.7058
3.9412	23.9572	122.825	100.406		86.6184
3.9706	24.1359	122.646	99.3623		86.6663
4	24.3146	122.467	99.1159		86.6776
4.0294	24.4933	122.289	99.4058		86.6643
4.0588	24.6721	122.11	101.225		86.5808
4.0882	24.8508	121.931	100.123		86.6313
4.1176	25.0295	121.752	99		86.6829
4.1471	25.2088	121.573	98.0362		86.7271
4.1765	25.3875	121.394	99.3333		86.6676
4.2059	25.5662	121.216	98.0797		86.7251
4.2353	25.7449	121.037	98.6957		86.6969
4.2647	25.9237	120.858	99.0942		86.6786
4.2941	26.1024	120.68	98.6014		86.7012
4.3235	26.2811	120.501	97.7754		86.7391
4.3529	26.4598	120.322	98.3623		86.7122
4.3824	26.6391	120.143	97.913		86.7328
4.4118	26.8178	119.964	99.2609		86.6709
4.4412	26.9965	119.785	99.4638		86.6616
4.4706	27.1752	119.607	97.7464		86.7404
4.5	27.354	119.428	98.5362		86.7042
4.5294	27.5327	119.249	97.587		86.7478
4.5588	27.7114	119.071	97.8623		86.7351
4.5882	27.8901	118.892	96.558		86.795
4.6176	28.0688	118.713	98.5217		86.7049
4.6471	28.2481	118.534	97.1957		86.7657
4.6765	28.4268	118.355	99.1449		86.6762
4.7059	28.6056	118.176	98.5145		86.7052
4.7353	28.7843	117.998	98.8116		86.6915
4.7647	28.963	117.819	99.5072		86.6596
4.7941	29.1417	117.64	98.1812		86.7205
4.8235	29.3204	117.462	98.0942		86.7245
4.8529	29.4991	117.283	98.2029		86.7195
4.8824	29.6784	117.104	99.3188		86.6683
4.9118	29.8572	116.925	100.181		86.6287
4.9412	30.0359	116.746	98.4565		86.7078
4.9706	30.2146	116.567	98.5145		86.7052
5	30.3933	116.389	98.2609		86.7168
5.0294	30.572	116.21	97.5362		86.7501
5.0588	30.7507	116.031	97.1667		86.767
5.0882	30.9294	115.853	97.3913		86.7567
5.1176	31.1081	115.674	99.5942		86.6556
5.1471	31.2875	115.494	98.8043		86.6919
5.1765	31.4662	115.316	99.0507		86.6806
5.2059	31.6449	115.137	99.587		86.656
5.2353	31.8236	114.958	101.601		86.5635
5.2647	32.0023	114.78	99.3043		86.6689
5.2941	32.181	114.601	99.3913		86.6649
5.3235	32.3597	114.422	98.6377		86.6995
5.3529	32.5384	114.244	99.7319		86.6493
5.3824	32.7178	114.064	100.768		86.6017
5.4118	32.8965	113.885	99.4928		86.6603
5.4412	33.0752	113.707	99.0217		86.6819
5.4706	33.2539	113.528	98.4058		86.7102
5.5	33.4326	113.349	98.5942		86.7015
5.5294	33.6113	113.171	99.5797		86.6563
5.5588	33.79	112.992	100.13		86.631
5.5882	33.9688	112.813	100.065		86.634
5.6176	34.1475	112.634	99.5145		86.6593
5.6471	34.3268	112.455	99.4783		86.6609
5.6765	34.5055	112.276	101.065		86.5881
5.7059	34.6842	112.098	100.065		86.634
5.7353	34.8629	111.919	99.8333		86.6447
5.7647	35.0416	111.74	101.529		86.5668
5.7941	35.2204	111.562	99.942		86.6397
5.8235	35.3991	111.383	99.442		86.6626
5.8529	35.5778	111.204	100.493		86.6144
5.8824	35.7571	111.025	99.7464		86.6486
5.9118	35.9358	110.846	100.225		86.6267
5.9412	36.1145	110.667	100.21		86.6274
5.9706	36.2932	110.489	99.4638		86.6616
6	36.4719	110.31	99.5217		86.659
6.0294	36.6507	110.131	99.029		86.6816
6.0588	36.8294	109.953	98.7029		86.6965
6.0882	37.0081	109.774	97.9638		86.7305
6.1176	37.1868	109.595	98.7681		86.6935
6.1471	37.3661	109.416	97.8696		86.7348
6.1765	37.5448	109.237	99.2681		86.6706
6.2059	37.7235	109.058	98.2681		86.7165
6.2353	37.9023	108.88	97.6522		86.7448
6.2647	38.081	108.701	97.913		86.7328
6.2941	38.2597	108.522	99.6812		86.6516
6.3235	38.4384	108.344	100.159		86.6297
6.3529	38.6171	108.165	99.5507		86.6576
6.3824	38.7964	107.986	99.7899		86.6466
6.4118	38.9751	107.807	99.2826		86.6699
6.4412	39.1539	107.628	100.427		86.6174
6.4706	39.3326	107.449	100.036		86.6353
6.5	39.5113	107.271	99.4638		86.6616
6.5294	39.69	107.092	98.2319		86.7182
6.5588	39.8687	106.913	100.297		86.6234
6.5882	40.0474	106.735	101.797		86.5545
6.6176	40.2261	106.556	97.7536		86.7401
6.6471	40.4054	106.377	97.6522		86.7448
6.6765	40.5842	106.198	97.1812		86.7664
6.7059	40.7629	106.019	98.913		86.6869
6.7353	40.9416	105.84	99.8261		86.645
6.7647	41.1203	105.662	98.4275		86.7092
6.7941	41.299	105.483	96.7899		86.7843
6.8235	41.4777	105.304	98.7536		86.6942
6.8529	41.6564	105.126	98.413		86.7098
6.8824	41.8358	104.946	98.0797		86.7251
6.9118	42.0145	104.767	98.2029		86.7195
6.9412	42.1932	104.589	97.6014		86.7471
6.9706	42.3719	104.41	96.5		86.7977
7	42.5506	104.231	97.7246		86.7414
7.0294	42.7293	104.053	98.1159		86.7235
7.0588	42.908	103.874	97.8043		86.7378
7.0882	43.0867	103.695	96.3043		86.8066
7.1176	43.2655	103.517	97.3188		86.7601
7.1471	43.4448	103.337	96.558		86.795
7.1765	43.6235	103.158	96.413		86.8016
7.2059	43.8022	102.98	97.1594		86.7674
7.2353	43.9809	102.801	98.3768		86.7115
7.2647	44.1596	102.622	99.4565		86.6619
7.2941	44.3383	102.444	97.8478		86.7358
7.3235	44.5171	102.265	96.5362		86.796
7.3529	44.6958	102.086	97.2899		86.7614
7.3824	44.8751	101.907	97.5362		86.7501
7.4118	45.0538	101.728	96.6812		86.7893
7.4412	45.2325	101.549	96.3913		86.8026
7.4706	45.4112	101.371	97.1159		86.7694
7.5	45.5899	101.192	97.3116		86.7604
7.5294	45.7686	101.013	99.1377		86.6766
7.5588	45.9474	100.835	96.7681		86.7853
7.5882	46.1261	100.656	97.6087		86.7468
7.6176	46.3048	100.477	98.087		86.7248
7.6471	46.4841	100.298	96.8768		86.7804
7.6765	46.6628	100.119	96.6014		86.793
7.7059	46.8415	99.9404	97.8913		86.7338
7.7353	47.0202	99.7617	97.0507		86.7724
7.7647	47.199	99.583	97.8986		86.7335
7.7941	47.3777	99.4043	96.5507		86.7953
7.8235	47.5564	99.2256	95.7536		86.8319
7.8529	47.7351	99.0469	96.3043		86.8066
7.8824	47.9144	98.8675	95.2246		86.8562
7.9118	48.0931	98.6888	94.7174		86.8795
7.9412	48.2718	98.5101	96.0145		86.8199
7.9706	48.4506	98.3314	96.7029		86.7883
8	48.6293	98.1527	95.6812		86.8352
8.0294	48.808	97.974	95.0217		86.8655
8.0588	48.9867	97.7953	96.6232		86.792
8.0882	49.1654	97.6166	95.6014	86.983	86.8389
8.1176	49.3441	97.4378	95.0072		86.8662
8.1471	49.5234	97.2585	95.4638		86.8452
8.1765	49.7021	97.0798	96.6014		86.793
8.2059	49.8809	96.9011	95.6014		86.8389
8.2353	50.0596	96.7224	95.9783		86.8216
8.2647	50.2383	96.5437	96.6739		86.7897
8.2941	50.417	96.365	96.2754		86.808
8.3235	50.5957	96.1863	95.1449		86.8598
8.3529	50.7744	96.0075	95.8623		86.8269
8.3824	50.9537	95.8282	96.1957		86.8116
8.4118	51.1325	95.6495	96.9058		86.779
8.4412	51.3112	95.4708	96.3116		86.8063
8.4706	51.4899	95.2921	94.7029		86.8801
8.5	51.6686	95.1134	95.9783		86.8216
8.5294	51.8473	94.9347	94.9855		86.8672
8.5588	52.026	94.7559	95.6087		86.8386
8.5882	52.2047	94.5772	95.0725		86.8632
8.6176	52.3834	94.3985	94.6739		86.8815
8.6471	52.5628	94.2192	96.3478		86.8046
8.6765	52.7415	94.0405	96.4493		86.8
8.7059	52.9202	93.8618	94.6884		86.8808
8.7353	53.0989	93.6831	93.7826		86.9224
8.7647	53.2776	93.5043	95.5942		86.8392
8.7941	53.4563	93.3256	94.8406		86.8738
8.8235	53.635	93.1469	95.971		86.8219
8.8529	53.8137	92.9682	95.7391		86.8326
8.8824	53.9931	92.7889	94.9348		86.8695
8.9118	54.1718	92.6102	95.6957		86.8346
8.9412	54.3505	92.4315	96.029		86.8193
8.9706	54.5292	92.2528	95.3188		86.8519
9	54.7079	92.074	94.6884		86.8808
9.0294	54.8866	91.8953	96.3406		86.805
9.0588	55.0653	91.7166	95.7029		86.8342
9.0882	55.2441	91.5379	96.4348		86.8006
9.1176	55.4228	91.3592	95.7826		86.8306
9.1471	55.6021	91.1799	96.2391		86.8096
9.1765	55.7808	91.0012	95.7319		86.8329
9.2059	55.9595	90.8224	95.3551		86.8502
9.2353	56.1382	90.6437	93		86.9583
9.2647	56.3169	90.465	93.6522		86.9284
9.2941	56.4957	90.2863	93.6957		86.9264
9.3235	56.6744	90.1076	95.2029		86.8572
9.3529	56.8531	89.9289	94.0145		86.9117
9.3824	57.0324	89.7496	95.2246		86.8562
9.4118	57.2111	89.5708	93.0435		86.9563
9.4412	57.3898	89.3921	92.6449		86.9746
9.4706	57.5685	89.2134	93.2246		86.948
9.5	57.7472	89.0347	92.5797		86.9776
9.5294	57.926	88.856	92.529		86.9799
9.5588	58.1047	88.6773	93.3043		86.9443
9.5882	58.2834	88.4986	92.8986		86.963
9.6176	58.4621	88.3199	93.2971		86.9447
9.6471	58.6414	88.1405	92.2536		86.9926
9.6765	58.8201	87.9618	91.7971		87.0135
9.7059	58.9988	87.7831	91.8333		87.0119
9.7353	59.1776	87.6044	92.1377		86.9979
9.7647	59.3563	87.4257	94.1087		86.9074
9.7941	59.535	87.247	93.9493		86.9147
9.8235	59.7137	87.0683	93.9058		86.9167
9.8529	59.8924	86.8896	93.0797		86.9546
9.8824	60.0717	86.7102	93.5652		86.9324
9.9118	60.2504	86.5315	93.4275		86.9387
9.9412	60.4292	86.3528	92.971		86.9596
9.9706	60.6079	86.1741	93.7826		86.9224
10	60.7866	85.9954	93.2464		86.947
10.0294	60.9653	85.8167	94.2174		86.9024
10.0588	61.144	85.638	94.1594		86.9051
10.0882	61.3227	85.4592	93.971		86.9137
10.1176	61.5014	85.2805	94.2319		86.9018
10.1471	61.6807	85.1012	93.9855		86.9131
10.1765	61.8595	84.9225	95.3623		86.8499
10.2059	62.0382	84.7438	95.4348		86.8465
10.2353	62.2169	84.5651	94.3478		86.8964
10.2647	62.3956	84.3864	93.4928		86.9357
10.2941	62.5743	84.2076	92.0797		87.0005
10.3235	62.753	84.0289	92.7029		86.9719
10.3529	62.9317	83.8502	95.2391		86.8555
10.3824	63.1111	83.6709	94.9928		86.8668
10.4118	63.2898	83.4922	94.4565		86.8914
10.4412	63.4685	83.3135	93.0725		86.955
10.4706	63.6472	83.1348	93.5145		86.9347
10.5	63.8259	82.9561	91.9565		87.0062
10.5294	64.0046	82.7773	93.4565		86.9373
10.5588	64.1833	82.5986	91.7319		87.0165
10.5882	64.362	82.4199	92.4058		86.9856
10.6176	64.5408	82.2412	92.6667		86.9736
10.6471	64.7201	82.0619	92.6159		86.9759
10.6765	64.8988	81.8832	91.9348		87.0072
10.7059	65.0775	81.7045	92.6739		86.9733
10.7353	65.2562	81.5257	93.5725		86.932
10.7647	65.4349	81.347	91.8623		87.0105
10.7941	65.6136	81.1683	92.3986		86.9859
10.8235	65.7924	80.9896	92.6884		86.9726
10.8529	65.9711	80.8109	93.1522		86.9513
10.8824	66.1504	80.6316	93.7029		86.926
10.9118	66.3291	80.4529	93.2101		86.9487
10.9412	66.5078	80.2741	92.1449		86.9975
10.9706	66.6865	80.0954	92.087		87.0002
11	66.8652	79.9167	92.0435		87.0022
11.0294	67.0439	79.738	91.9058		87.0085
11.0588	67.2227	79.5593	90.7754		87.0604
11.0882	67.4014	79.3806	91.4855		87.0278
11.1176	67.5801	79.2019	92.9783		86.9593
11.1471	67.7594	79.0226	92.4493		86.9836
11.1765	67.9381	78.8438	92.4348		86.9842
11.2059	68.1168	78.6651	91.7826		87.0142
11.2353	68.2955	78.4864	91.9275		87.0075
11.2647	68.4743	78.3077	93.7609		86.9234
11.2941	68.653	78.129	92.0145		87.0035
11.3235	68.8317	77.9503	93.3913		86.9403
11.3529	69.0104	77.7716	92.587		86.9773
11.3824	69.1897	77.5922	91.1957		87.0411
11.4118	69.3684	77.4135	91.4275		87.0305
11.4412	69.5471	77.2348	92.6232		86.9756
11.4706	69.7259	77.0561	90.8768		87.0558
11.5	69.9046	76.8774	92		87.0042
11.5294	70.0833	76.6987	92.2536		86.9926
11.5588	70.262	76.52	92.6812		86.9729
11.5882	70.4407	76.3413	90.7174		87.0631
11.6176	70.6194	76.1625	90.8333		87.0578
11.6471	70.7987	75.9832	90.4783		87.074
11.6765	70.9774	75.8045	89.2319		87.1313
11.7059	71.1562	75.6258	91.5217		87.0262
11.7353	71.3349	75.4471	92.3551		86.9879
11.7647	71.5136	75.2684	90.5435		87.0711
11.7941	71.6923	75.0897	90.0217		87.095
11.8235	71.871	74.9109	91.2754		87.0375
11.8529	72.0497	74.7322	92.442		86.9839
11.8824	72.229	74.5529	92.0725		87.0009
11.9118	72.4078	74.3742	90.587		87.0691
11.9412	72.5865	74.1955	91.2609		87.0381
11.9706	72.7652	74.0168	91.0435		87.0481
12	72.9439	73.8381	90.6014		87.0684
12.0294	73.1226	73.6594	90.7319		87.0624
12.0588	73.3013	73.4806	91.7536		87.0155
12.0882	73.48	73.3019	93.3043	86.9441	86.9443
12.1176	73.6587	73.1232	90.9565		87.0521
12.1471	73.8381	72.9439	90.7971		87.0594
12.1765	74.0168	72.7652	90.9493		87.0524
12.2059	74.1955	72.5865	90.9493		87.0524
12.2353	74.3742	72.4078	91.7174		87.0172
12.2647	74.5529	72.229	91.6522		87.0202
12.2941	74.7316	72.0503	91.9203		87.0079
12.3235	74.9103	71.8716	91.1667		87.0424
12.3529	75.0891	71.6929	90.8986		87.0548
12.3824	75.2684	71.5136	91.442		87.0298
12.4118	75.4471	71.3349	91.4638		87.0288
12.4412	75.6258	71.1562	90.8696		87.0561
12.4706	75.8045	70.9774	91.5942		87.0228
12.5	75.9832	70.7987	91.1594		87.0428
12.5294	76.1619	70.62	91.4565		87.0291
12.5588	76.3406	70.4413	91.529		87.0258
12.5882	76.5194	70.2626	90.6812		87.0647
12.6176	76.6981	70.0839	90.7029		87.0637
12.6471	76.8774	69.9046	90.8986		87.0548
12.6765	77.0561	69.7259	91.4638		87.0288
12.7059	77.2348	69.5471	90.5072		87.0727
12.7353	77.4135	69.3684	91.5507		87.0248
12.7647	77.5922	69.1897	90.4493		87.0754
12.7941	77.771	69.011	92.6014		86.9766
12.8235	77.9497	68.8323	92.8333		86.966
12.8529	78.1284	68.6536	91.9928		87.0045
12.8824	78.3077	68.4743	91.3188		87.0355
12.9118	78.4864	68.2955	89.4783		87.1199
12.9412	78.6651	68.1168	88.9493		87.1442
12.9706	78.8438	67.9381	90.2029		87.0867
13	79.0226	67.7594	90.5797		87.0694
13.0294	79.2013	67.5807	93.2609		86.9463
13.0588	79.38	67.402	91.6232		87.0215
13.0882	79.5587	67.2233	92.4493		86.9836
13.1176	79.7374	67.0446	90.6739		87.0651
13.1471	79.9167	66.8652	91.413		87.0311
13.1765	80.0954	66.6865	91.8913		87.0092
13.2059	80.2741	66.5078	90.4638		87.0747
13.2353	80.4529	66.3291	89.8261		87.104
13.2647	80.6316	66.1504	90.2536		87.0844
13.2941	80.8103	65.9717	90.8116		87.0587
13.3235	80.989	65.793	91.1232		87.0444
13.3529	81.1677	65.6142	90.2391		87.085
13.3824	81.347	65.4349	89.6739		87.111
13.4118	81.5257	65.2562	88.3696		87.1708
13.4412	81.7045	65.0775	89.3913		87.1239
13.4706	81.8832	64.8988	89.3116		87.1276
13.5	82.0619	64.7201	90.8333		87.0578
13.5294	82.2406	64.5414	91.058		87.0474
13.5588	82.4193	64.3627	89.7899		87.1056
13.5882	82.598	64.1839	89.3261		87.1269
13.6176	82.7767	64.0052	91.8261		87.0122
13.6471	82.9561	63.8259	92.2681		86.9919
13.6765	83.1348	63.6472	90.3406		87.0804
13.7059	83.3135	63.4685	90.4058		87.0774
13.7353	83.4922	63.2898	91.413		87.0311
13.7647	83.6709	63.1111	91.1232		87.0444
13.7941	83.8496	62.9323	91.0217		87.0491
13.8235	84.0283	62.7536	89.9058		87.1003
13.8529	84.207	62.5749	90.3768		87.0787
13.8824	84.3864	62.3956	90.6522		87.0661
13.9118	84.5651	62.2169	90.4203		87.0767
13.9412	84.7438	62.0382	90.0652		87.093
13.9706	84.9225	61.8595	90.6594		87.0657
14	85.1012	61.6807	89.8768		87.1017
14.0294	85.2799	61.502	89.4275		87.1223
14.0588	85.4586	61.3233	88.0217		87.1868
14.0882	85.6373	61.1446	90.2754		87.0834
14.1176	85.8161	60.9659	88.8551		87.1486
14.1471	85.9954	60.7866	88.971		87.1432
14.1765	86.1741	60.6079	89.971		87.0973
14.2059	86.3528	60.4292	89.8551		87.1027
14.2353	86.5315	60.2504	91.4275		87.0305
14.2647	86.7102	60.0717	89.3043		87.1279
14.2941	86.8889	59.893	90.2174		87.086
14.3235	87.0677	59.7143	88.529		87.1635
14.3529	87.2464	59.5356	90.1812		87.0877
14.3824	87.4257	59.3563	90.9855		87.0508
14.4118	87.6044	59.1776	91.1594		87.0428
14.4412	87.7831	58.9988	89.2174		87.1319
14.4706	87.9618	58.8201	89.529		87.1176
14.5	88.1405	58.6414	90.7609		87.0611
14.5294	88.3193	58.4627	91.9928		87.0045
14.5588	88.498	58.284	92.2246		86.9939
14.5882	88.6767	58.1053	90.8478		87.0571
14.6176	88.8554	57.9266	92.3333		86.9889
14.6471	89.0347	57.7472	91.4638		87.0288
14.6765	89.2134	57.5685	90.2101		87.0864
14.7059	89.3921	57.3898	89.6449		87.1123
14.7353	89.5708	57.2111	89.0217		87.1409
14.7647	89.7496	57.0324	91.0507		87.0478
14.7941	89.9283	56.8537	92.1377		86.9979
14.8235	90.107	56.675	90.2754		87.0834
14.8529	90.2857	56.4963	89.2029		87.1326
14.8824	90.465	56.3169	90.8116		87.0587
14.9118	90.6437	56.1382	89.1884		87.1333
14.9412	90.8224	55.9595	90.3406		87.0804
14.9706	91.0012	55.7808	91.7899		87.0138
15	91.1799	55.6021	92.0145		87.0035
15.0294	91.3586	55.4234	90.0145		87.0953
15.0588	91.5373	55.2447	89.1812		87.1336
15.0882	91.716	55.066	89.5797		87.1153
15.1176	91.8947	54.8872	89.3623		87.1253
15.1471	92.074	54.7079	90.7464		87.0617
15.1765	92.2528	54.5292	90.1522		87.089
15.2059	92.4315	54.3505	90.7536		87.0614
15.2353	92.6102	54.1718	91.8913		87.0092
15.2647	92.7889	53.9931	89.7609		87.107
15.2941	92.9676	53.8144	89.0072		87.1416
15.3235	93.1463	53.6356	89.8986		87.1007
15.3529	93.325	53.4569	89.6812		87.1106
15.3824	93.5043	53.2776	90.1667		87.0883
15.4118	93.6831	53.0989	91.6014		87.0225
15.4412	93.8618	52.9202	90.2971		87.0824
15.4706	94.0405	52.7415	90.8406		87.0574
15.5	94.2192	52.5628	90.0072		87.0957
15.5294	94.3979	52.384	90.9565		87.0521
15.5588	94.5766	52.2053	90.9348		87.0531
15.5882	94.7553	52.0266	90.1957		87.087
15.6176	94.934	51.8479	88.1594		87.1805
15.6471	95.1134	51.6686	88.4855		87.1655
15.6765	95.2921	51.4899	89.5145		87.1183
15.7059	95.4708	51.3112	90.0217		87.095
15.7353	95.6495	51.1325	90.7391		87.0621
15.7647	95.8282	50.9537	90.8043		87.0591
15.7941	96.0069	50.775	89.6014		87.1143
15.8235	96.1856	50.5963	90.3043		87.082
15.8529	96.3644	50.4176	90.0652		87.093
15.8824	96.5437	50.2383	90.5507		87.0707
15.9118	96.7224	50.0596	91.5		87.0272
15.9412	96.9011	49.8809	90.8551		87.0568
15.9706	97.0798	49.7021	90.6304		87.0671
16	97.2585	49.5234	88.8406		87.1492
16.0294	97.4372	49.3447	90.8696		87.0561
16.0588	97.616	49.166	91.2609		87.0381
16.0882	97.7947	48.9873	90.8768		87.0558
16.1176	97.9734	48.8086	91.0435	86.9158	87.0481
16.1471	98.1527	48.6293	91.1232		87.0444
16.1765	98.3314	48.4506	92.3841		86.9866
16.2059	98.5101	48.2718	92.8043		86.9673
16.2353	98.6888	48.0931	91.5507		87.0248
16.2647	98.8675	47.9144	92.1957		86.9952
16.2941	99.0463	47.7357	91.8261		87.0122
16.3235	99.225	47.557	91.9275		87.0075
16.3529	99.4037	47.3783	92.2464		86.9929
16.3824	99.583	47.199	92.3261		86.9892
16.4118	99.7617	47.0202	93.2246		86.948
16.4412	99.9404	46.8415	93.7971		86.9217
16.4706	100.119	46.6628	92.4203		86.9849
16.5	100.298	46.4841	93.6087		86.9304
16.5294	100.477	46.3054	93.3188		86.9437
16.5588	100.655	46.1267	94.0217		86.9114
16.5882	100.834	45.948	91.9058		87.0085
16.6176	101.013	45.7693	91.087		87.0461
16.6471	101.192	45.5899	92.1232		86.9985
16.6765	101.371	45.4112	92.1014		86.9995
16.7059	101.549	45.2325	92.1304		86.9982
16.7353	101.728	45.0538	94.3696		86.8954
16.7647	101.907	44.8751	92.587		86.9773
16.7941	102.086	44.6964	93.3551		86.942
16.8235	102.264	44.5177	93.087		86.9543
16.8529	102.443	44.3389	92.5		86.9813
16.8824	102.622	44.1596	92.1014		86.9995
16.9118	102.801	43.9809	92.8841		86.9636
16.9412	102.98	43.8022	93.471		86.9367
16.9706	103.158	43.6235	93.6812		86.927
17	103.337	43.4448	93.4855		86.936
17.0294	103.516	43.2661	92.4638		86.9829
17.0588	103.695	43.0874	92.3333		86.9889
17.0882	103.873	42.9086	93.7174		86.9254
17.1176	104.052	42.7299	93.7609		86.9234
17.1471	104.231	42.5506	92.1812		86.9959
17.1765	104.41	42.3719	92.3768		86.9869
17.2059	104.589	42.1932	93.8551		86.9191
17.2353	104.767	42.0145	94.558		86.8868
17.2647	104.946	41.8358	93.558		86.9327
17.2941	105.125	41.657	94.4203		86.8931
17.3235	105.304	41.4783	94.6522		86.8825
17.3529	105.482	41.2996	94.6594		86.8821
17.3824	105.662	41.1203	94.7319		86.8788
17.4118	105.84	40.9416	94.7246		86.8791
17.4412	106.019	40.7629	94.2536		86.9008
17.4706	106.198	40.5842	93.7609		86.9234
17.5	106.377	40.4054	94.8696		86.8725
17.5294	106.555	40.2267	95.0217		86.8655
17.5588	106.734	40.048	95.3841		86.8489
17.5882	106.913	39.8693	95.4058		86.8479
17.6176	107.091	39.6906	95.529		86.8422
17.6471	107.271	39.5113	96.0942		86.8163
17.6765	107.449	39.3326	94.8986		86.8712
17.7059	107.628	39.1539	96.3478		86.8046
17.7353	107.807	38.9751	97.7319		86.7411
17.7647	107.986	38.7964	95.7899		86.8302
17.7941	108.164	38.6177	98.1087		86.7238
17.8235	108.343	38.439	96.7101		86.788
17.8529	108.522	38.2603	96.9783		86.7757
17.8824	108.701	38.081	99.1377		86.6766
17.9118	108.88	37.9023	99.2101		86.6733
17.9412	109.058	37.7235	97.7246		86.7414
17.9706	109.237	37.5448	96.8841		86.78
18	109.416	37.3661	99.2101		86.6733
18.0294	109.595	37.1874	98.4275		86.7092
18.0588	109.773	37.0087	97.7174		86.7418
18.0882	109.952	36.83	100.246		86.6257
18.1176	110.131	36.6513	99.1232		86.6772
18.1471	110.31	36.4719	100.587		86.6101
18.1765	110.489	36.2932	99.8116		86.6456
18.2059	110.667	36.1145	99		86.6829
18.2353	110.846	35.9358	100.63		86.6081
18.2647	111.025	35.7571	100.775		86.6014
18.2941	111.204	35.5784	100.435		86.617
18.3235	111.382	35.3997	101.906		86.5495
18.3529	111.561	35.221	100.971		86.5924
18.3824	111.74	35.0416	101.761		86.5562
18.4118	111.919	34.8629	101.63		86.5622
18.4412	112.098	34.6842	101.63		86.5622
18.4706	112.276	34.5055	101.754		86.5565
18.5	112.455	34.3268	101.152		86.5841
18.5294	112.634	34.1481	102.101		86.5405
18.5588	112.813	33.9694	101.848		86.5522
18.5882	112.991	33.7907	102.906		86.5036
18.6176	113.17	33.6119	102.5		86.5222
18.6471	113.349	33.4326	104.406		86.4348
18.6765	113.528	33.2539	102		86.5452
18.7059	113.707	33.0752	103.029		86.498
18.7353	113.885	32.8965	102.587		86.5183
18.7647	114.064	32.7178	101.232		86.5805
18.7941	114.243	32.5391	103.007		86.499
18.8235	114.422	32.3603	102.681		86.5139
18.8529	114.6	32.1816	103.058		86.4966
18.8824	114.78	32.0023	105.116		86.4022
18.9118	114.958	31.8236	105.529		86.3832
18.9412	115.137	31.6449	105.225		86.3972
18.9706	115.316	31.4662	105.203		86.3982
19	115.494	31.2875	104.957		86.4095
19.0294	115.673	31.1087	105.181		86.3992
19.0588	115.852	30.93	106.036		86.3599
19.0882	116.031	30.7513	106.413		86.3426
19.1176	116.209	30.5726	107.659		86.2854
19.1471	116.389	30.3933	106.37		86.3446
19.1765	116.567	30.2146	105.927		86.3649
19.2059	116.746	30.0359	108.203		86.2605
19.2353	116.925	29.8572	108.261		86.2578
19.2647	117.104	29.6784	106.261		86.3496
19.2941	117.282	29.4997	107.478		86.2937
19.3235	117.461	29.321	107.471		86.2941
19.3529	117.64	29.1423	108.529		86.2455
19.3824	117.819	28.963	109.283		86.2109
19.4118	117.998	28.7843	109.913		86.182
19.4412	118.176	28.6056	110.333		86.1627
19.4706	118.355	28.4268	109.536		86.1993
19.5	118.534	28.2481	109.442		86.2036
19.5294	118.713	28.0694	108.573		86.2435
19.5588	118.891	27.8907	109.341		86.2083
19.5882	119.07	27.712	110.913		86.1361
19.6176	119.249	27.5333	110.399		86.1597
19.6471	119.428	27.354	111.348		86.1161
19.6765	119.607	27.1752	113.094		86.036
19.7059	119.785	26.9965	113.768		86.005
19.7353	119.964	26.8178	113.862		86.0007
19.7647	120.143	26.6391	112.667		86.0556
19.7941	120.322	26.4604	113.283		86.0273
19.8235	120.5	26.2817	113.703		86.008
19.8529	120.679	26.103	113.906		85.9987
19.8824	120.858	25.9237	114.203		85.9851
19.9118	121.037	25.7449	116.094		85.8983
19.9412	121.216	25.5662	114.804		85.9575
19.9706	121.394	25.3875	115.746		85.9142
20	121.573	25.2088	116.145		85.8959
20.0294	121.752	25.0301	116.609		85.8747
20.0588	121.931	24.8514	117.13		85.8507
20.0882	122.109	24.6727	118.761		85.7759
20.1176	122.288	24.494	118.739	85.7886	85.7769
20.1471	122.467	24.3146	119.5		85.742
20.1765	122.646	24.1359	119.406		85.7463
20.2059	122.825	23.9572	118.507		85.7875
20.2353	123.003	23.7785	118.384		85.7932
20.2647	123.182	23.5998	120.565		85.6931
20.2941	123.361	23.4211	120		85.719
20.3235	123.54	23.2424	120.957		85.6751
20.3529	123.718	23.0636	120.188		85.7104
20.3824	123.898	22.8843	121.21		85.6635
20.4118	124.076	22.7056	122.862		85.5876
20.4412	124.255	22.5269	122.449		85.6066
20.4706	124.434	22.3482	123.101		85.5766
20.5	124.612	22.1695	122.688		85.5956
20.5294	124.791	21.9908	122.413		85.6082
20.5588	124.97	21.812	122.065		85.6242
20.5882	125.149	21.6333	123.674		85.5504
20.6176	125.327	21.4546	124.13		85.5294
20.6471	125.507	21.2753	125.326		85.4745
20.6765	125.685	21.0966	125.478		85.4675
20.7059	125.864	20.9179	127.427		85.3781
20.7353	126.043	20.7392	127.022		85.3967
20.7647	126.222	20.5605	126.826		85.4057
20.7941	126.4	20.3817	127.5		85.3748
20.8235	126.579	20.203	127.399		85.3794
20.8529	126.758	20.0243	127.587		85.3708
20.8824	126.937	19.845	129.558		85.2803
20.9118	127.116	19.6663	128.877		85.3116
20.9412	127.294	19.4876	128.123		85.3461
20.9706	127.473	19.3089	128.775		85.3162
21	127.652	19.1301	129.319		85.2913
21.0294	127.831	18.9514	130.63		85.2311
21.0588	128.009	18.7727	130.949		85.2164
21.0882	128.188	18.594	131.101		85.2094
21.1176	128.367	18.4153	132.283		85.1552
21.1471	128.546	18.236	132.152		85.1612
21.1765	128.725	18.0573	132.862		85.1286
21.2059	128.903	17.8785	132.507		85.1449
21.2353	129.082	17.6998	132.623		85.1396
21.2647	129.261	17.5211	134.036		85.0747
21.2941	129.44	17.3424	133.572		85.096
21.3235	129.618	17.1637	133.565		85.0964
21.3529	129.797	16.985	136.652		84.9547
21.3824	129.976	16.8057	136.819		84.947
21.4118	130.155	16.627	136.928		84.942
21.4412	130.334	16.4482	136.862		84.945
21.4706	130.512	16.2695	137.254		84.9271
21.5	130.691	16.0908	139.572		84.8206
21.5294	130.87	15.9121	139.348		84.8309
21.5588	131.049	15.7334	138.514		84.8692
21.5882	131.227	15.5547	139.109		84.8419
21.6176	131.406	15.376	138.399		84.8745
21.6471	131.585	15.1966	140.428		84.7814
21.6765	131.764	15.0179	141.094		84.7508
21.7059	131.943	14.8392	141.109		84.7501
21.7353	132.121	14.6605	141.63		84.7262
21.7647	132.3	14.4818	142.891		84.6683
21.7941	132.479	14.3031	142.406		84.6906
21.8235	132.658	14.1244	142.732		84.6756
21.8529	132.836	13.9457	143.993		84.6177
21.8824	133.016	13.7663	144.391		84.5994
21.9118	133.194	13.5876	144.906		84.5758
21.9412	133.373	13.4089	144.862		84.5778
21.9706	133.552	13.2302	143.819		84.6257
22	133.73	13.0515	146.457		84.5046
22.0294	133.909	12.8728	147.71		84.4471
22.0588	134.088	12.6941	147.783		84.4438
22.0882	134.267	12.5153	147.949		84.4361
22.1176	134.445	12.3366	146.449		84.505
22.1471	134.625	12.1573	148.37		84.4168
22.1765	134.803	11.9786	148.986		84.3886
22.2059	134.982	11.7999	148.884		84.3932
22.2353	135.161	11.6212	151.188		84.2875
22.2647	135.339	11.4425	151.138		84.2898
22.2941	135.518	11.2638	152.384		84.2326
22.3235	135.697	11.085	151.442		84.2758
22.3529	135.876	10.9063	152.572		84.2239
22.3824	136.055	10.727	152.174		84.2422
22.4118	136.234	10.5483	152.877		84.21
22.4412	136.412	10.3696	154.428		84.1388
22.4706	136.591	10.1909	153.406		84.1857
22.5	136.77	10.0122	154.297		84.1448
22.5294	136.949	9.83344	154.935		84.1155
22.5588	137.127	9.65473	153.891		84.1634
22.5882	137.306	9.47602	155.464		84.0912
22.6176	137.485	9.29731	155		84.1125
22.6471	137.664	9.11799	155.065		84.1095
22.6765	137.843	8.93927	157.181		84.0124
22.7059	138.021	8.76056	156.341		84.051
22.7353	138.2	8.58185	158.399		83.9565
22.7647	138.379	8.40314	160.087		83.879
22.7941	138.558	8.22442	159.109		83.9239
22.8235	138.736	8.04571	160.609		83.8551
22.8529	138.915	7.867	161.514		83.8135
22.8824	139.094	7.68768	162.507		83.7679
22.9118	139.273	7.50897	161.906		83.7955
22.9412	139.452	7.33025	161.072		83.8338
22.9706	139.63	7.15154	161.601		83.8095
23	139.809	6.97283	162.312		83.7769
23.0294	139.988	6.79412	163.428		83.7257
23.0588	140.167	6.6154	163.746		83.711
23.0882	140.345	6.43669	164.812		83.6621
23.1176	140.524	6.25798	165.355		83.6372
23.1471	140.703	6.07866	166.696		83.5757
23.1765	140.882	5.89995	166.957		83.5637
23.2059	141.061	5.72123	166.732		83.574
23.2353	141.239	5.54252	167.5		83.5388
23.2647	141.418	5.36381	168.188		83.5072
23.2941	141.597	5.1851	169.109		83.4649
23.3235	141.776	5.00638	168.406		83.4972
23.3529	141.954	4.82767	169.029		83.4686
23.3824	142.134	4.64835	171.471		83.3565
23.4118	142.312	4.46964	170.949		83.3804
23.4412	142.491	4.29092	169.283		83.4569
23.4706	142.67	4.11221	171.261		83.3661
23.5	142.848	3.9335	171.203		83.3688
23.5294	143.027	3.75479	172.899		83.291
23.5588	143.206	3.57607	173.326		83.2713
23.5882	143.385	3.39736	174.319		83.2258
23.6176	143.563	3.21865	174.355		83.2241
23.6471	143.743	3.03933	174.522		83.2165
23.6765	143.921	2.86062	174.072		83.2371
23.7059	144.1	2.6819	176.283		83.1356
23.7353	144.279	2.50319	176.239		83.1376
23.7647	144.457	2.32448	176.725		83.1153
23.7941	144.636	2.14577	178.217		83.0468
23.8235	144.815	1.96705	178.457		83.0358
23.8529	144.994	1.78834	178.623		83.0282
23.8824	145.173	1.60902	178.341		83.0412
23.9118	145.352	1.43031	178.928		83.0142
23.9412	145.53	1.2516	179.986		82.9657
23.9706	145.709	1.07288	179.739		82.977
24	145.888	0.894171	179.862		82.9713
24.0294	146.067	0.715458	182.13		82.8672
24.0588	146.245	0.536745	182.232		82.8626
24.0882	146.424	0.358033	182.362		82.8566
24.1176	146.603	0.17932	182.029		82.8719
24.1471	146.782	0	183.094	82.8204	82.823
24.1765	146.961
24.2059	147.139
24.2353	147.318
24.2647	147.497
24.2941	147.676
24.3235	147.854
24.3529	148.033
24.3824	148.212
24.4118	148.391
24.4412	148.57
24.4706	148.748
24.5	148.927
24.5294	149.106
24.5588	149.285
24.5882	149.463
24.6176	149.642
24.6471	149.821
24.6765	150

[truncated: 15 more sheets: Ep5_8, Ep5_11, Ep5_15_SW_edge_data, Ep5_18, Ep8_1, Ep8_2, Ep8_11, Ep8_12, Ep10_12, Ep15_1, Ep15_5, Ep15_10, Ep15_12, Ep15_17, Ep15_22]
